# Supplementary material for: USP33 promotes pancreatic cancer malignant phenotype through the regulation of TGFBR2/TGFβ signaling pathway
Source: PubMed Central journal article supplement (PMC10272277; doi:10.1038/s41419-023-05871-4), 2023-06-15

Fig1E

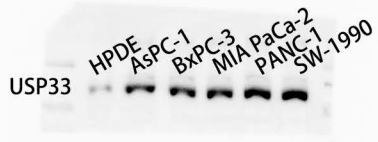

Fig1E

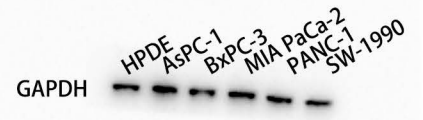

Fig1H

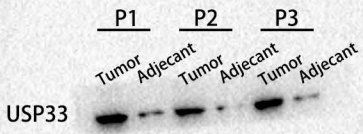

Fig1H

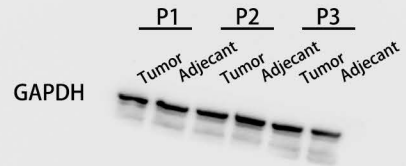

Fig1H

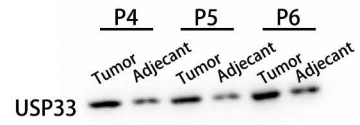

Fig1H

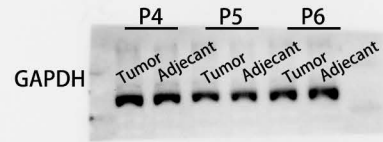

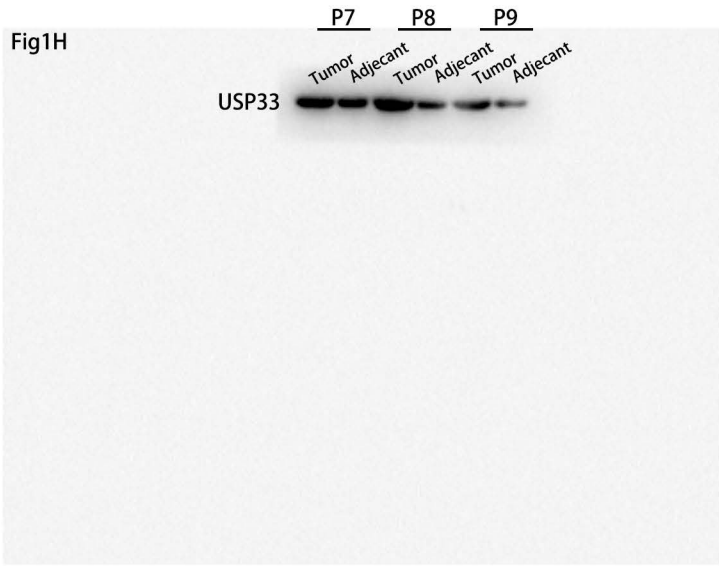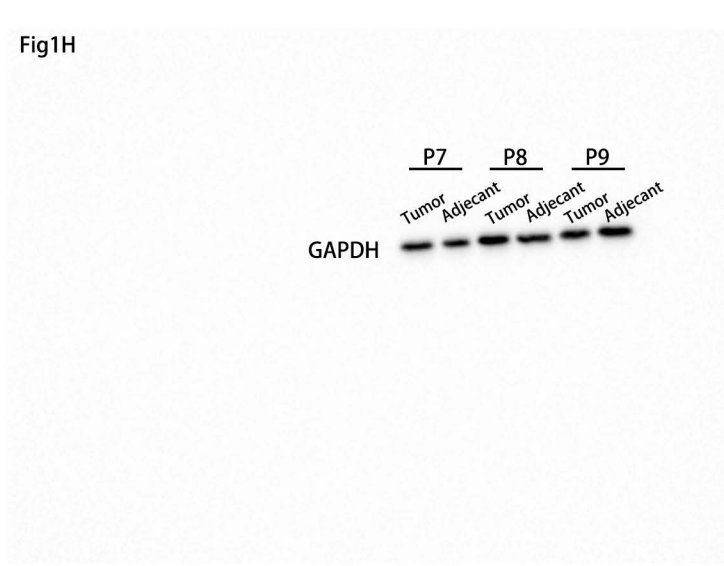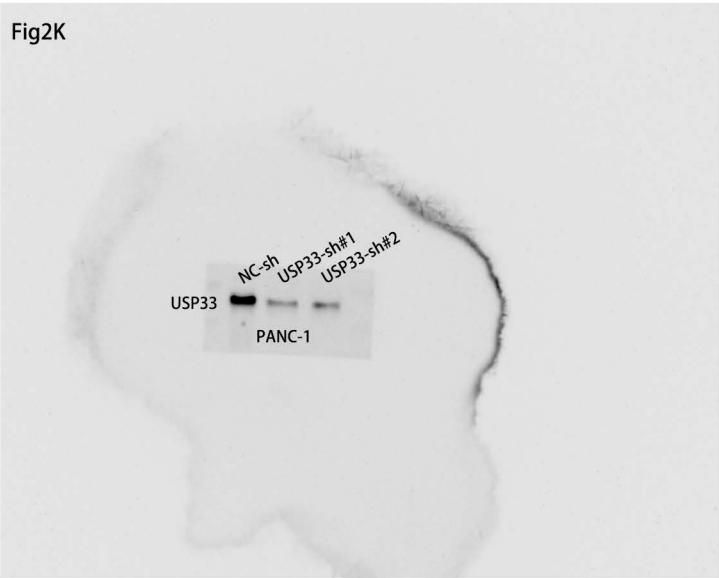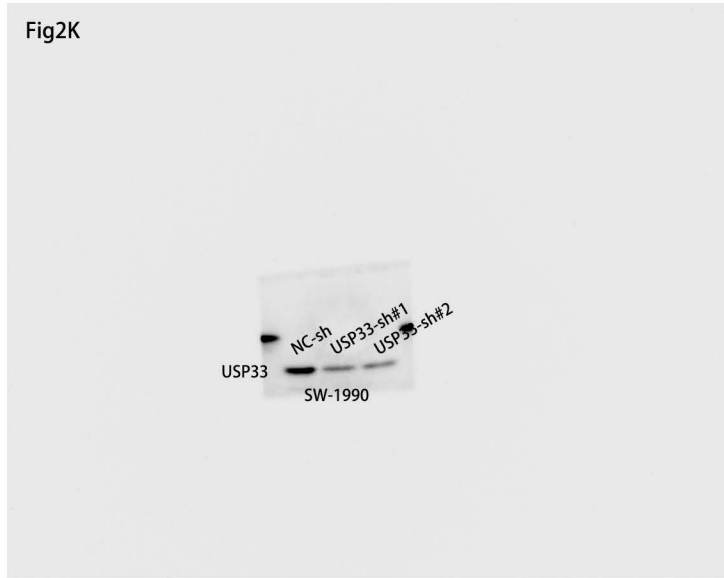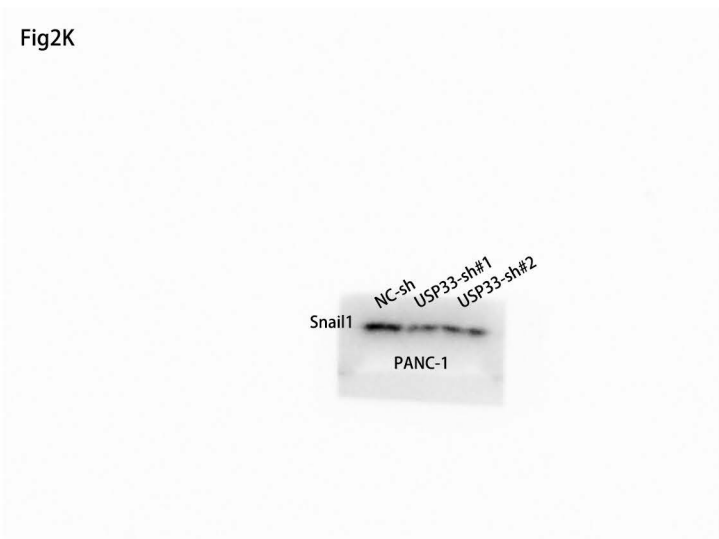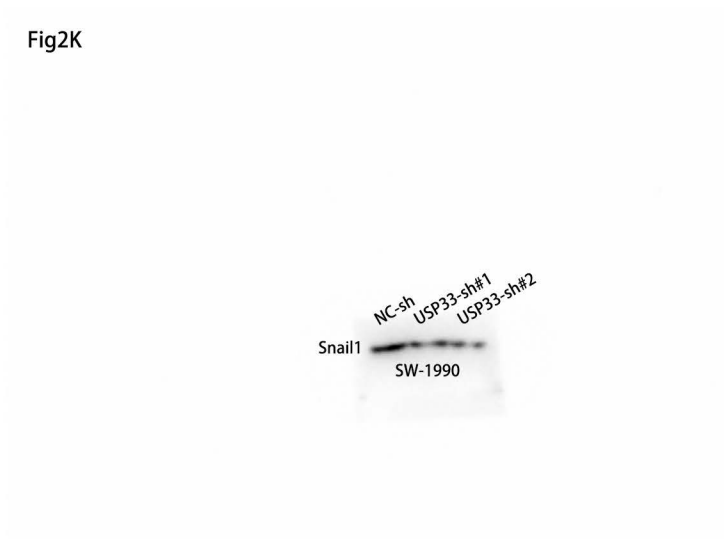

Fig2K

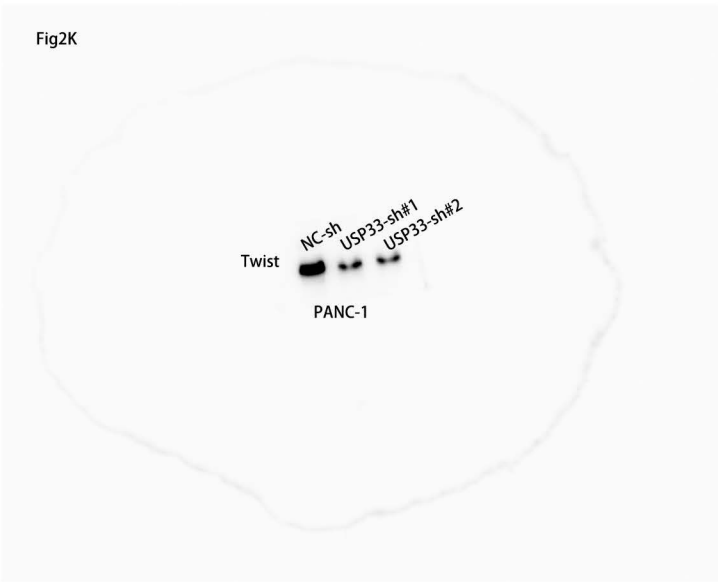

Fig2K

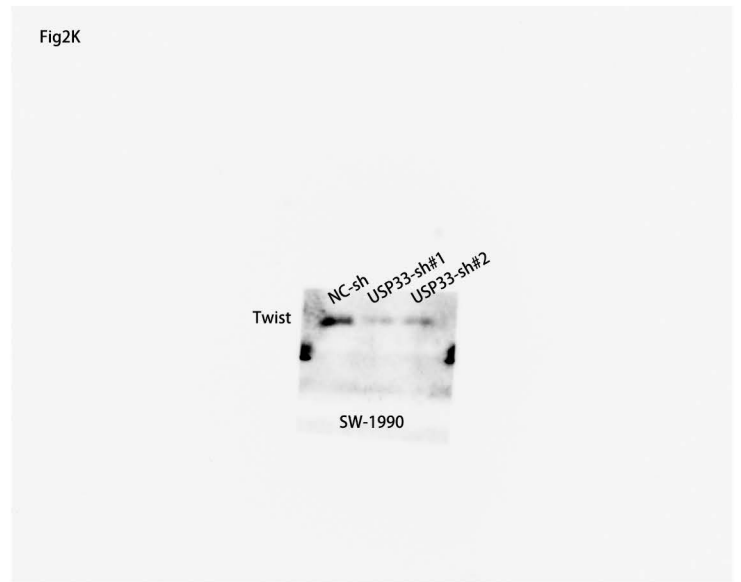

Fig2K

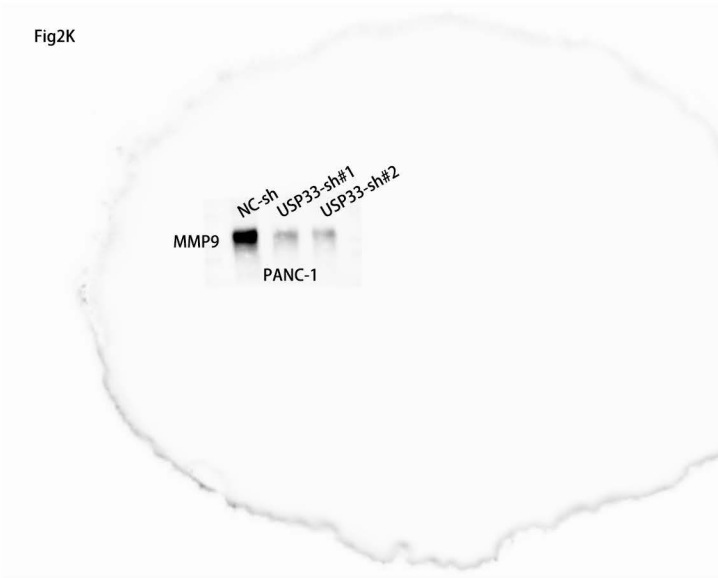

Fig2K

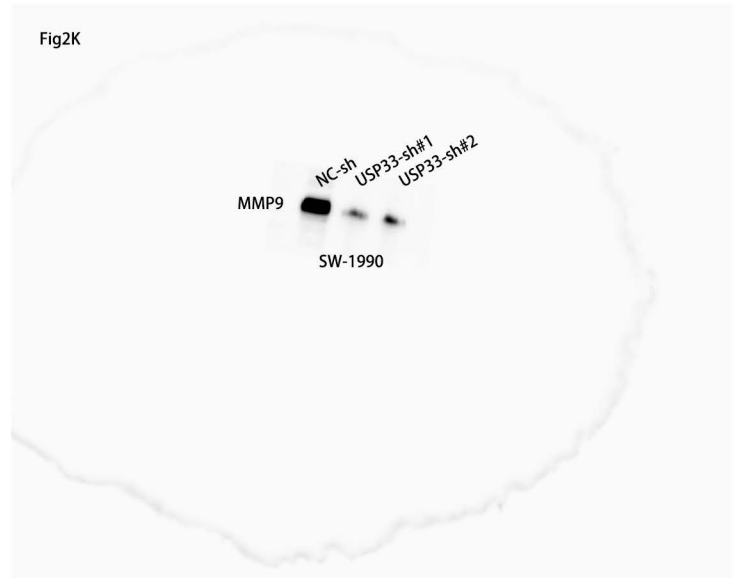

Fig2K

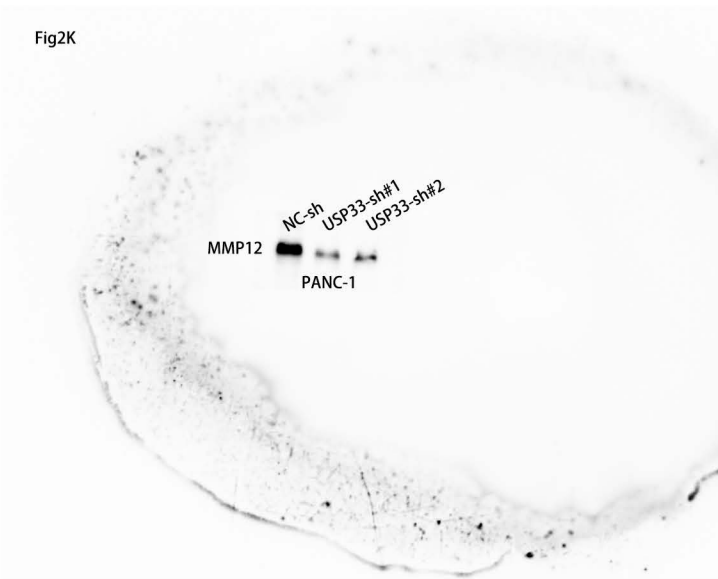

Fig2K

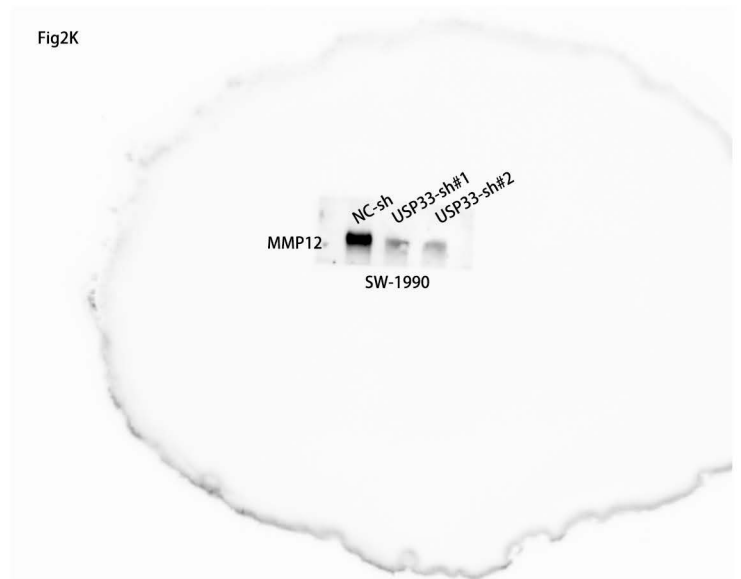

Fig2K

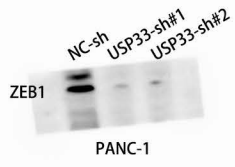

Fig2K

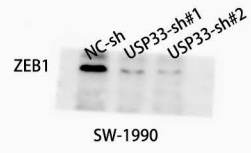

Fig2K

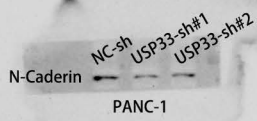

Fig2K

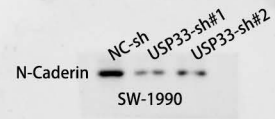

Fig2K

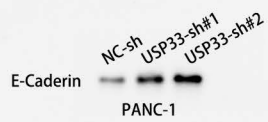

Fig2K

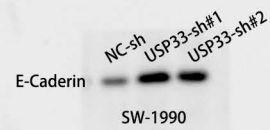

Fig2K

GAPDH NC-sh USP33-sh#1 USP33-sh#2  
PANC-1

Fig2K

GAPDH NC-sh USP33-sh#1 USP33-sh#2  
SW-1990

Fig3D

USP33 NC-sh USP33-sh#1 USP33-sh#2  
PANC-1

Fig3D

USP33 NC-sh USP33-sh#1 USP33-sh#2  
SW-1990

Fig3D

SMAD2/3 NC-sh USP33-sh#1 USP33-sh#2  
PANC-1

Fig3D

SMAD2/3 NC-sh USP33-sh#1 USP33-sh#2  
SW-1990

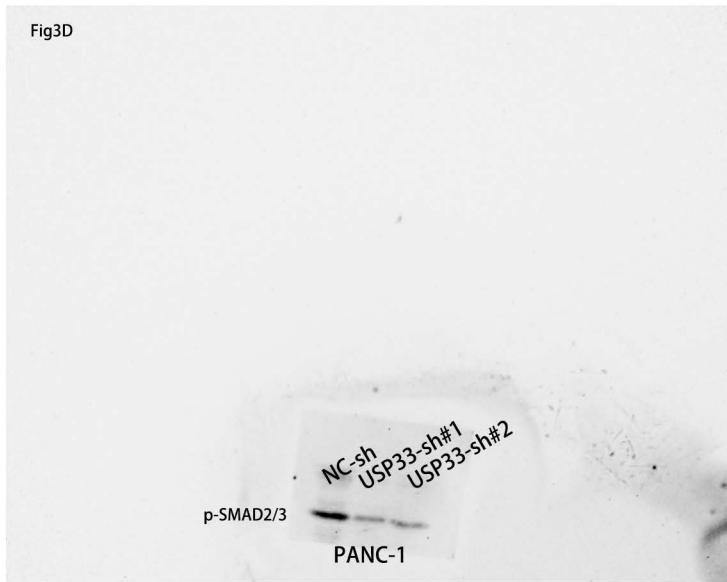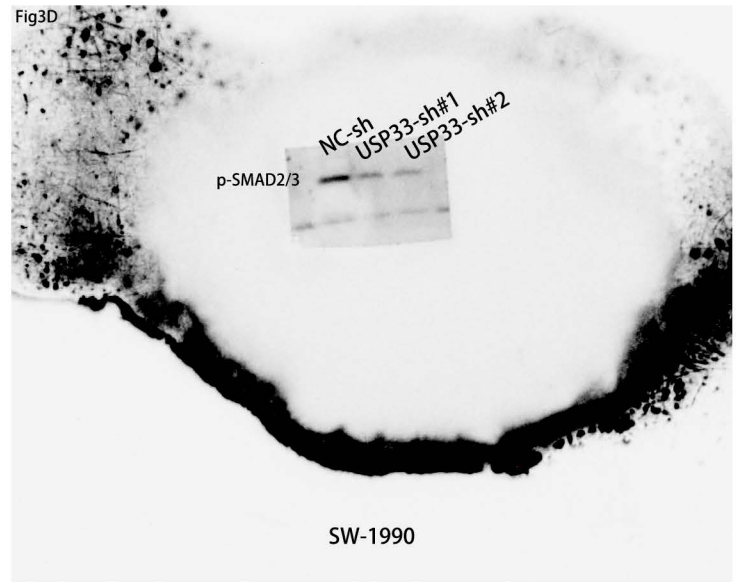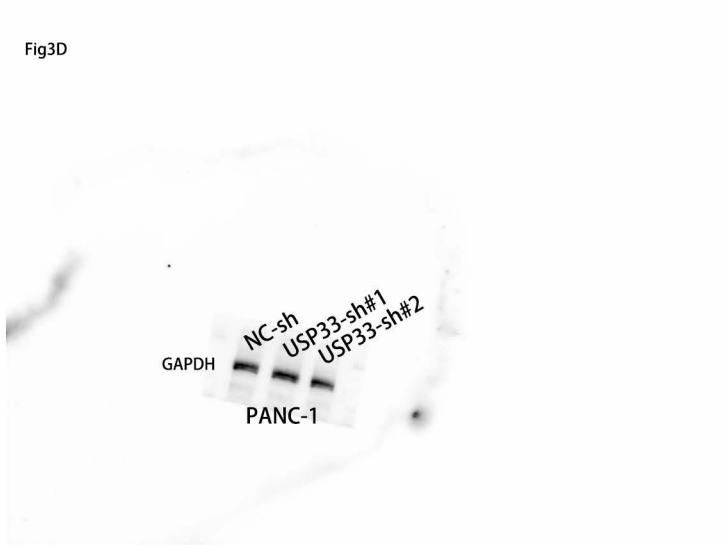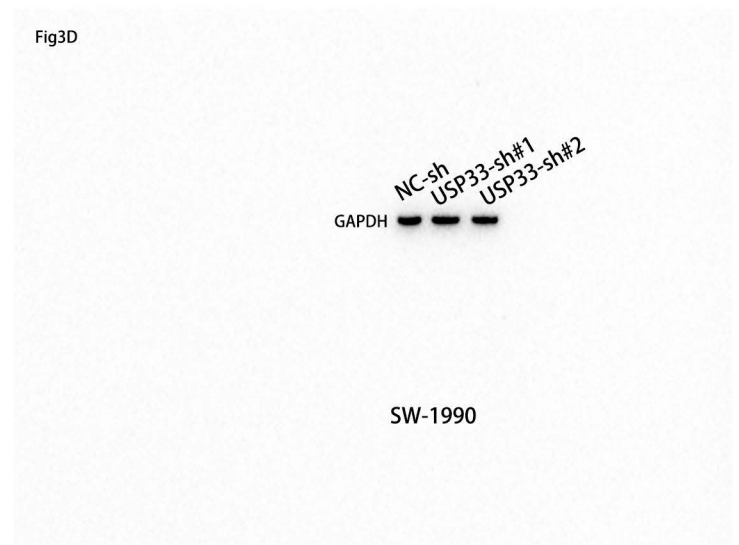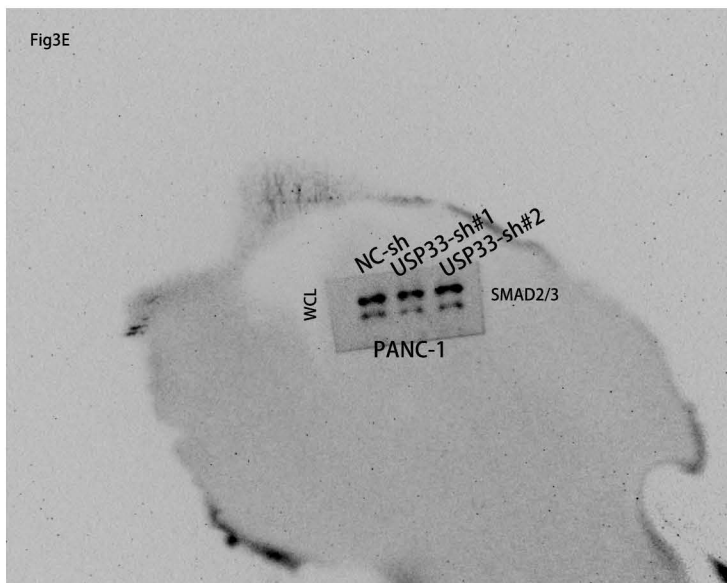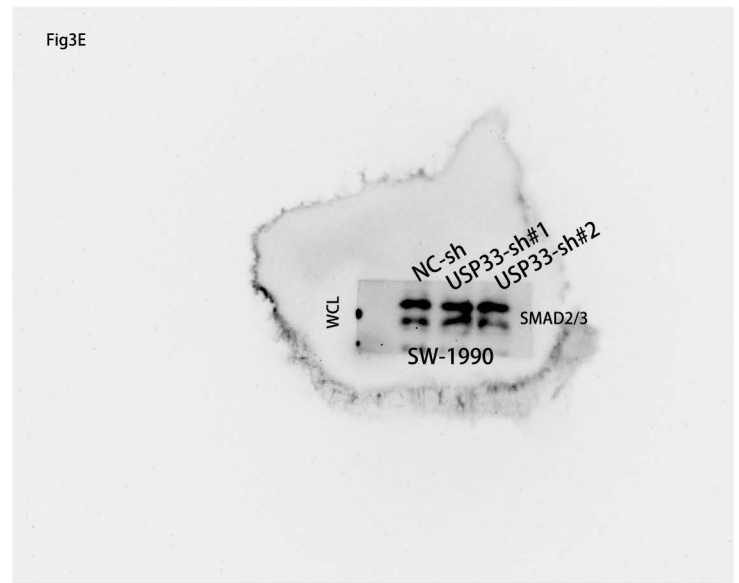

Fig3E

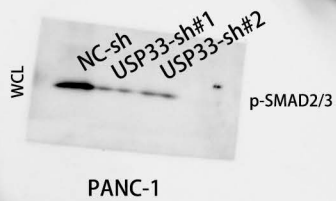

Fig3E

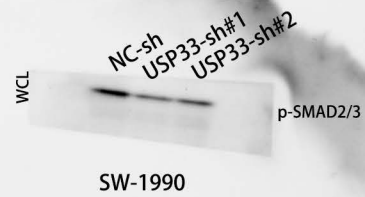

Fig3E

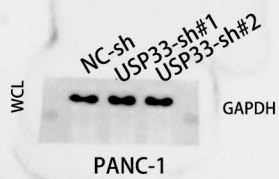

Fig3E

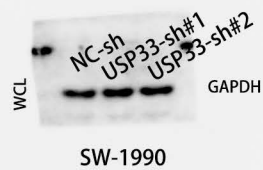

Fig3E

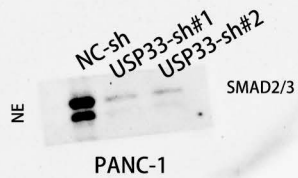

Fig3E

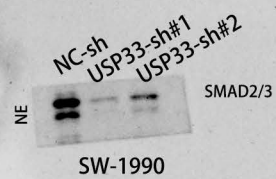

Fig3E

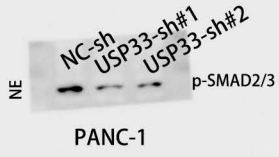

Fig3E

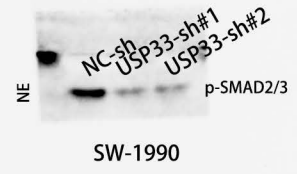

Fig3E

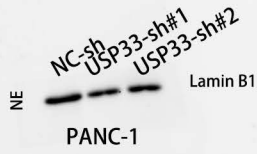

Fig3E

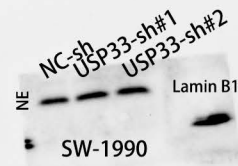

Fig3H

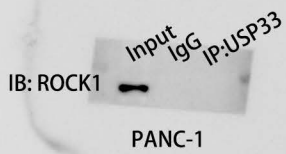

Fig3H

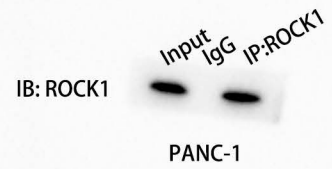



Fig3H

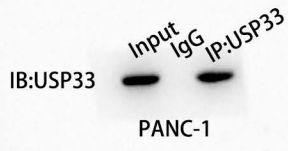

Fig3H

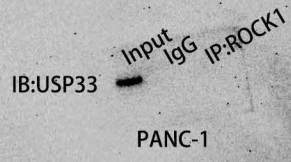

Fig3H

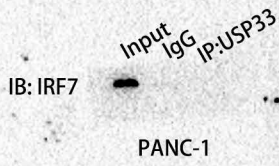

Fig3H

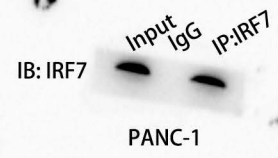

Fig3H

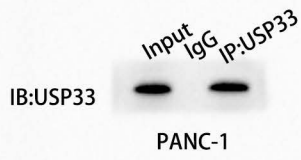

Fig3H

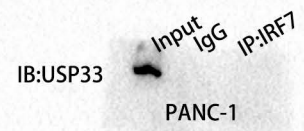

Fig3H

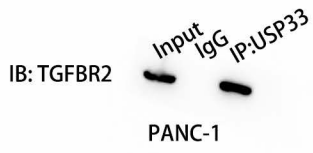

Fig3H

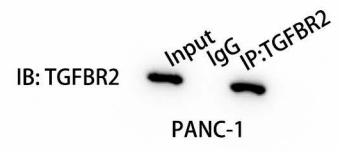

Fig3H

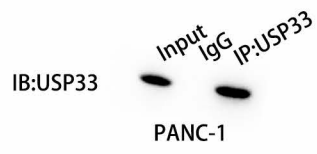

Fig3H

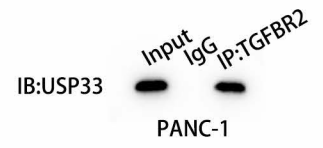

Fig3H

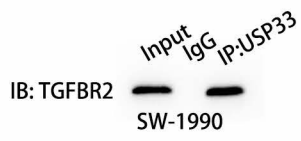

Fig3H

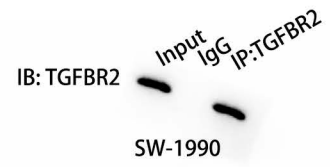

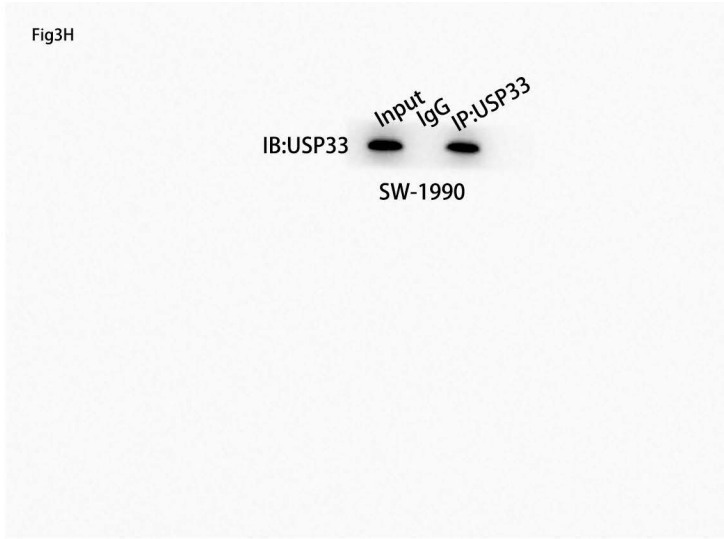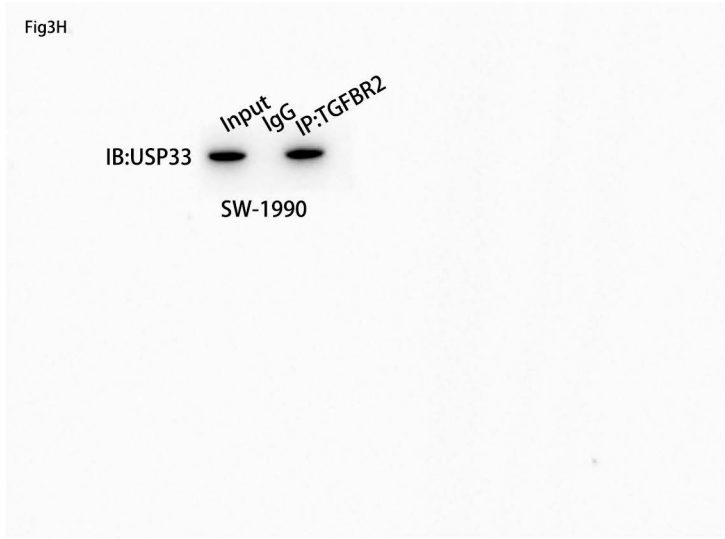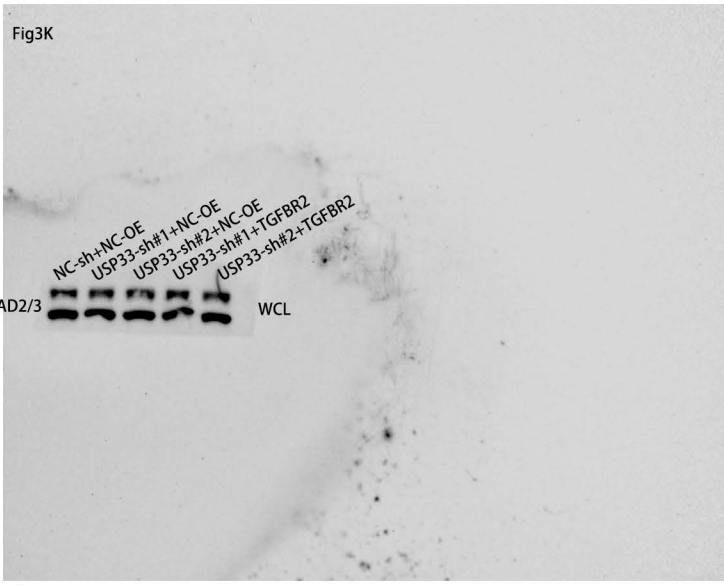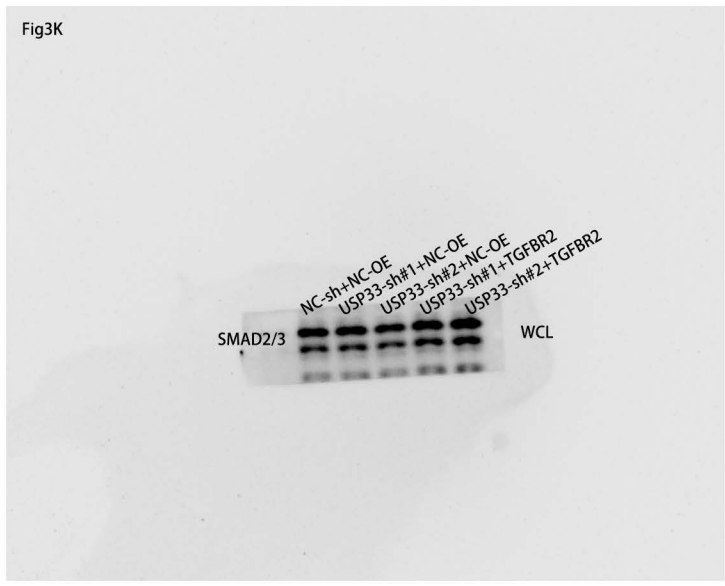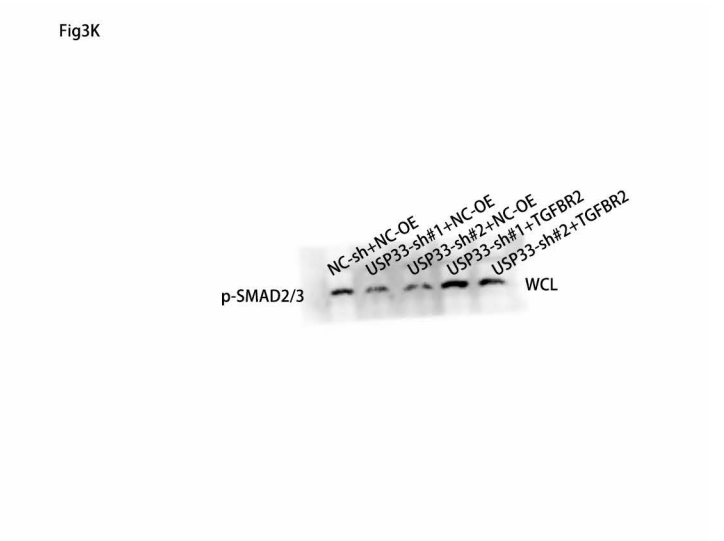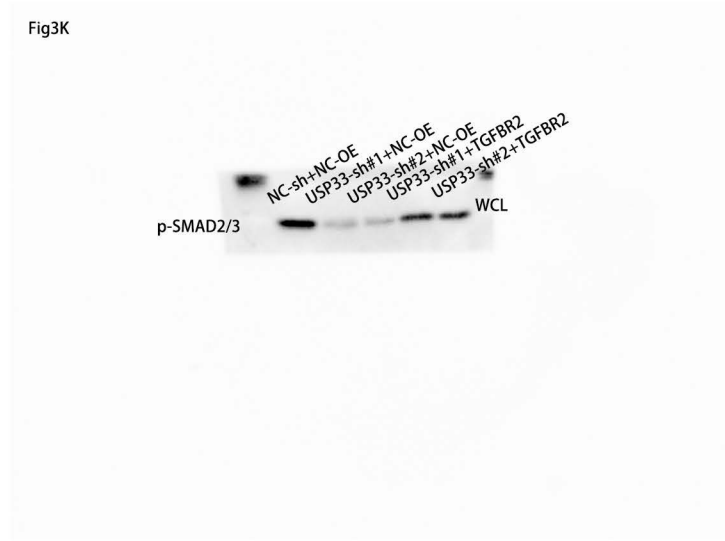

Fig3K

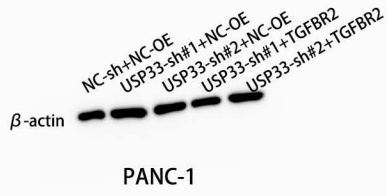

Fig3K

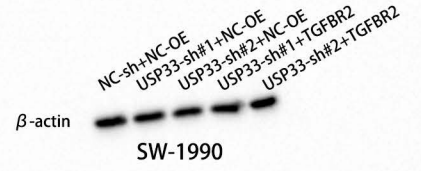

Fig3K

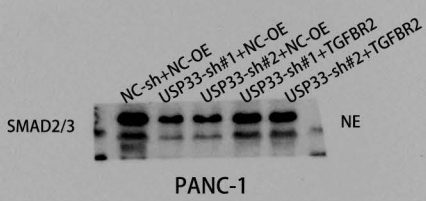

Fig3K

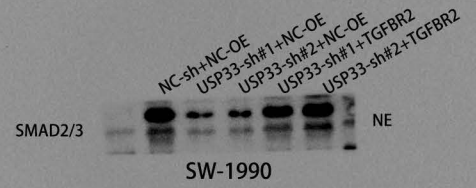

Fig3K

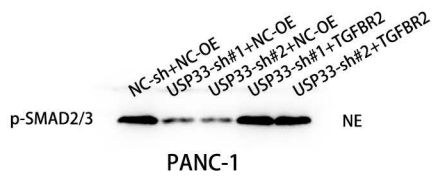

Fig3K

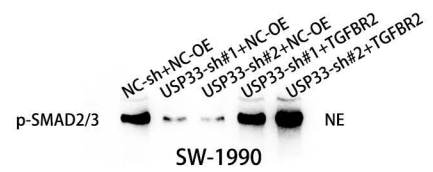

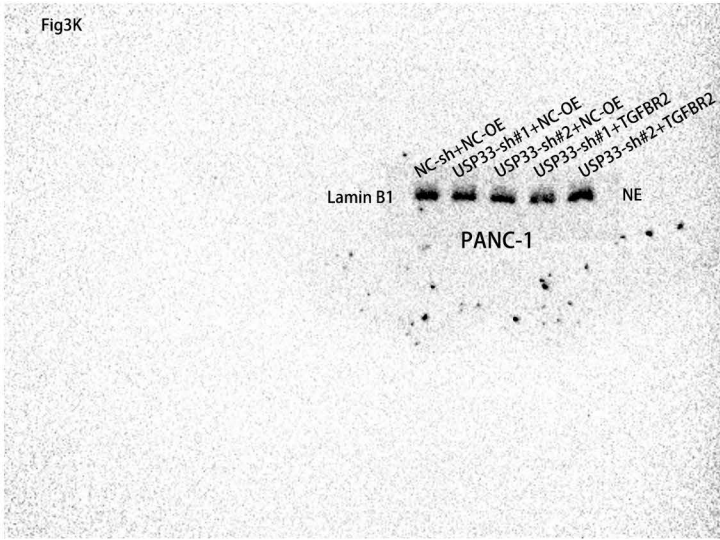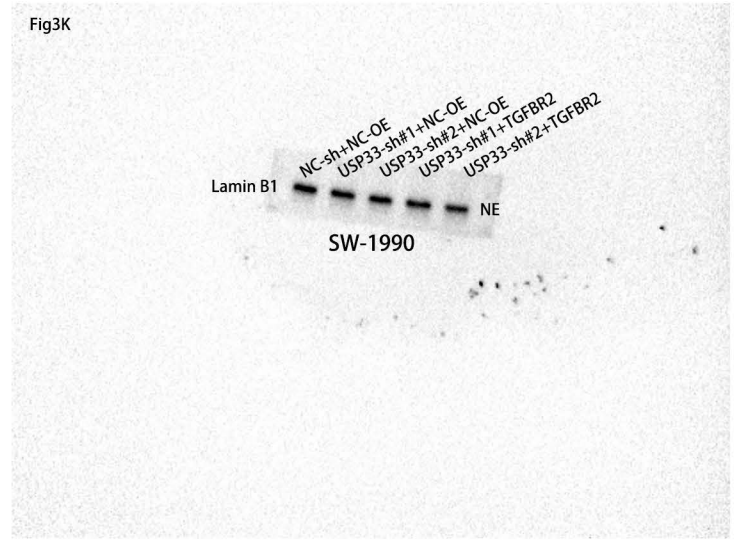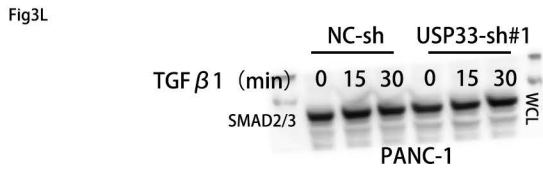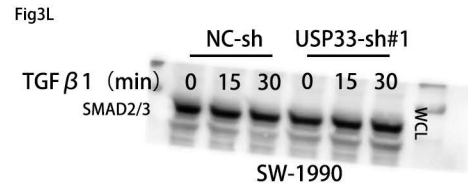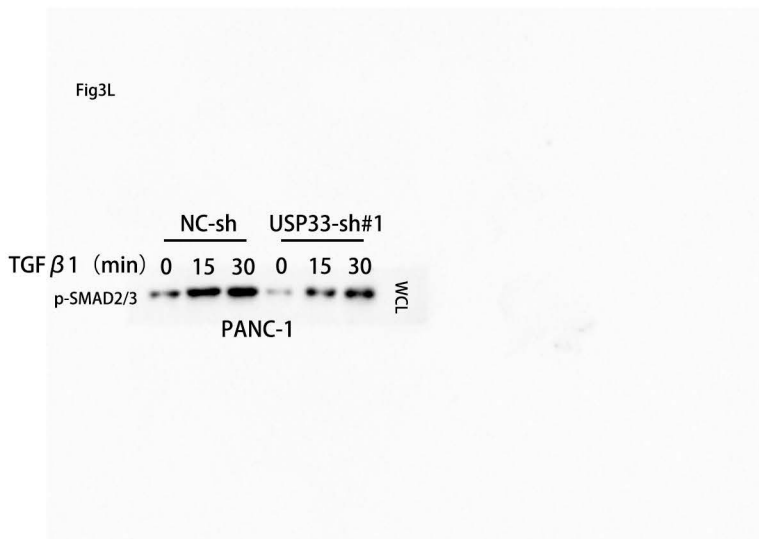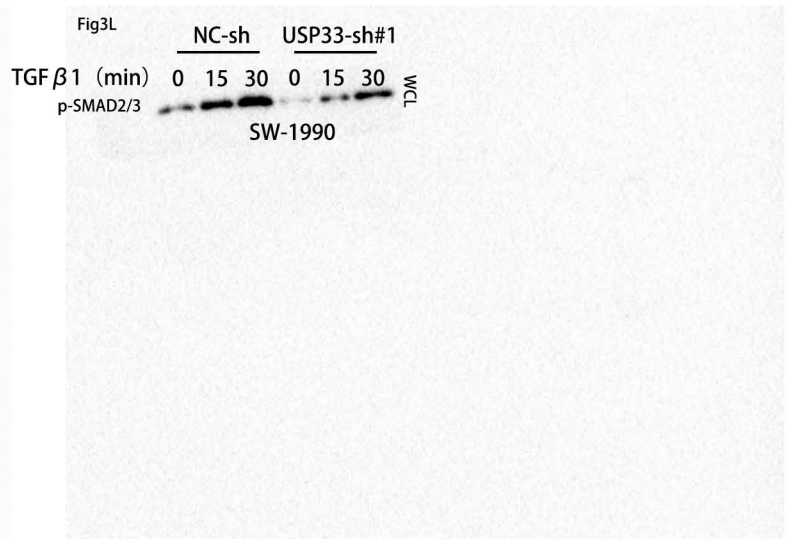

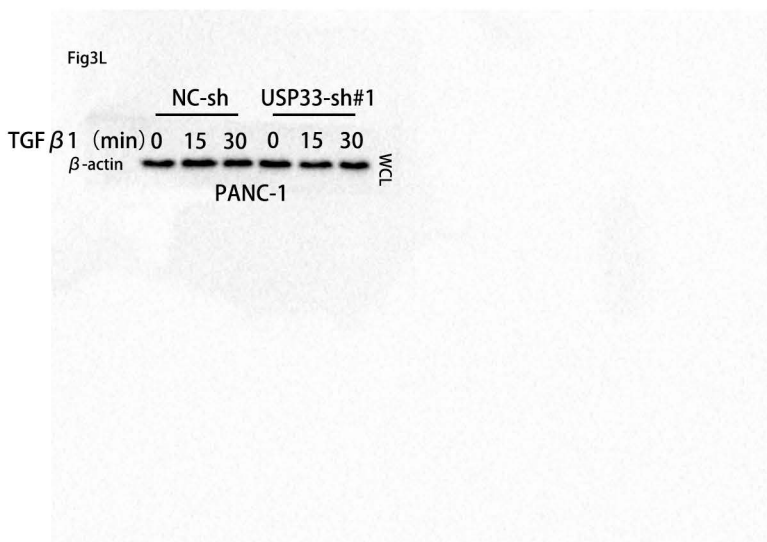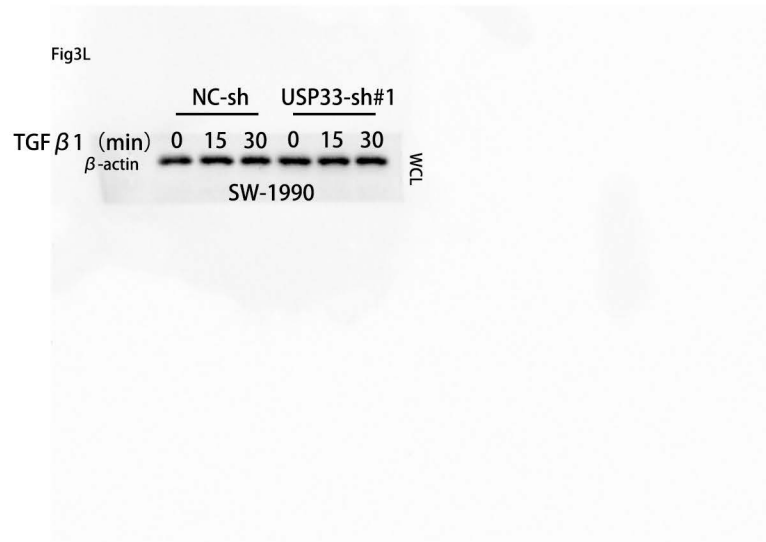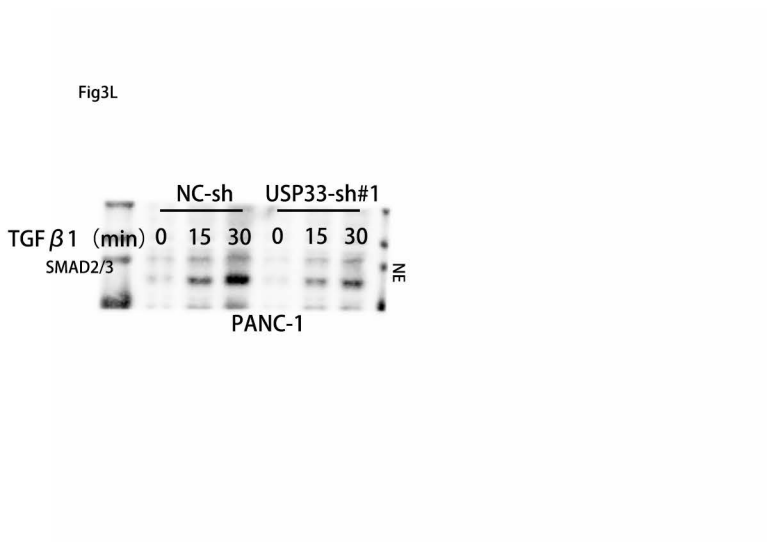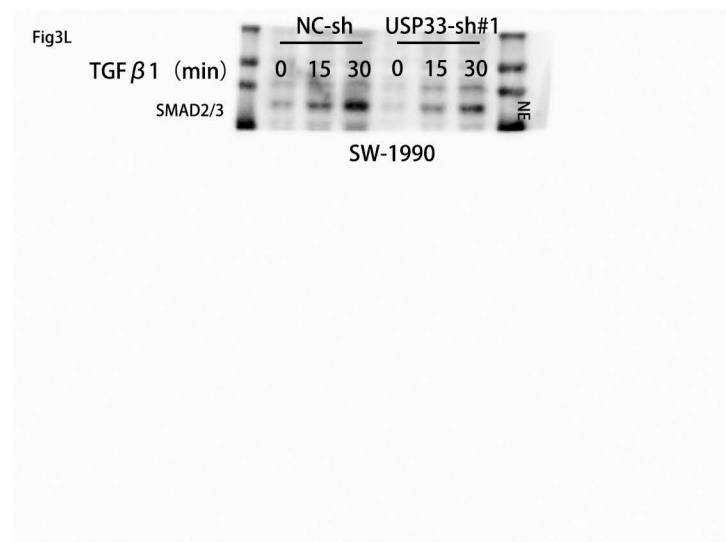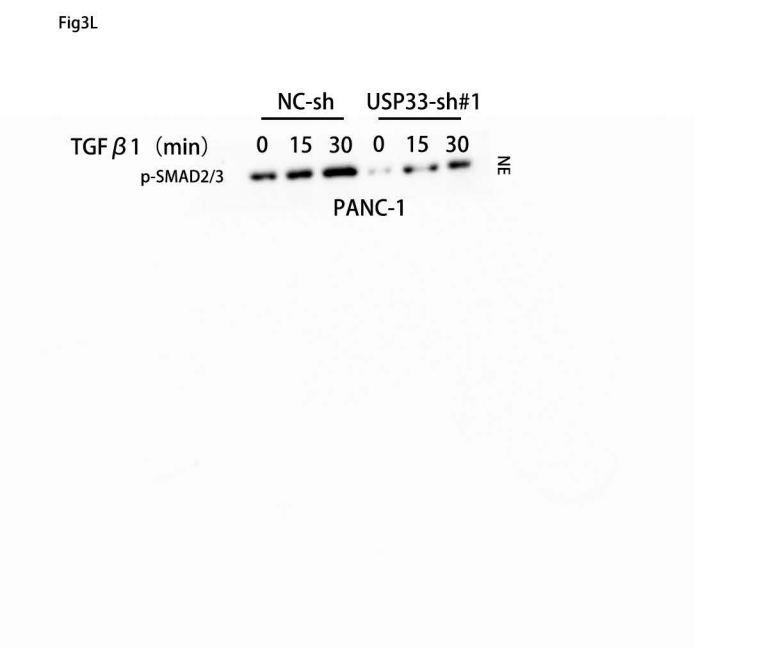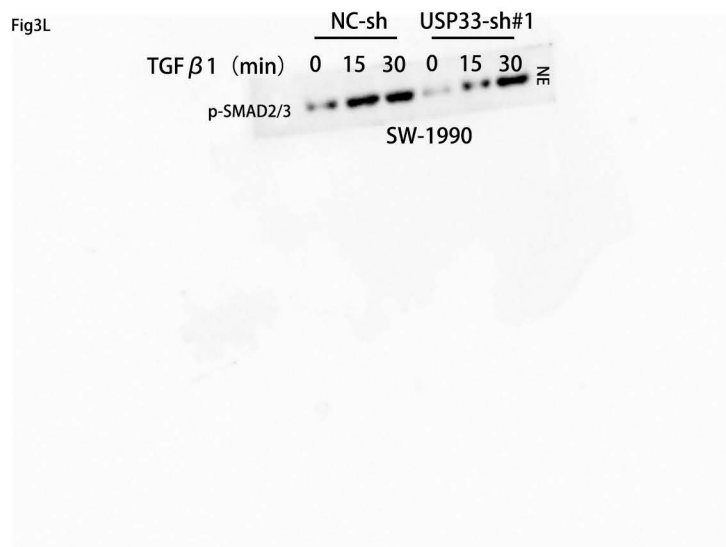

Fig3L

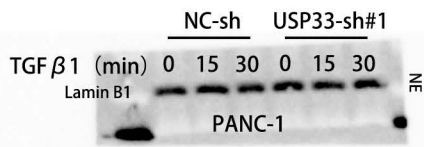

Fig3L

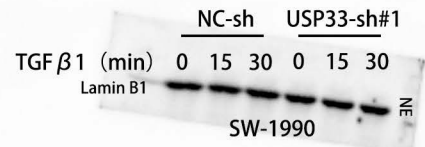

Fig4J

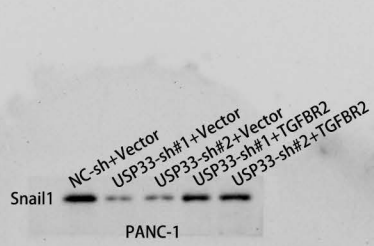

Fig4J

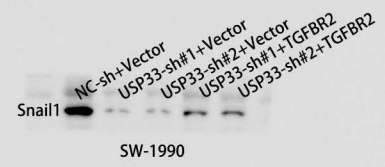

Fig4J

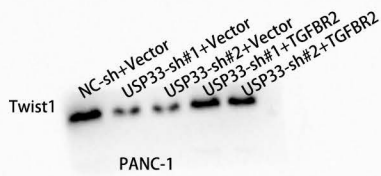

Fig4J

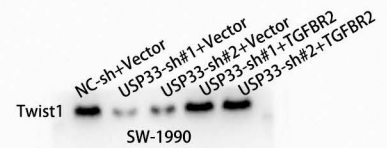

Fig4J

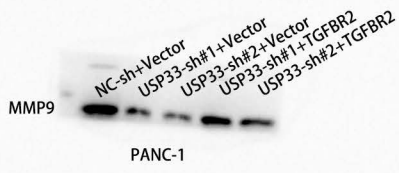

Fig4J

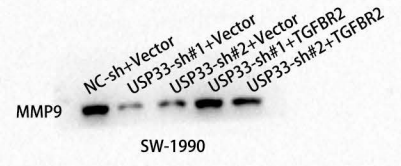

Fig4J

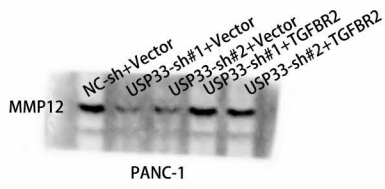

Fig4J

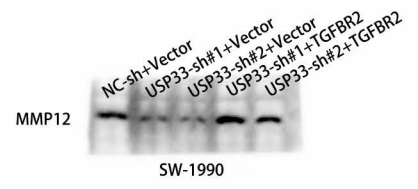

Fig4J

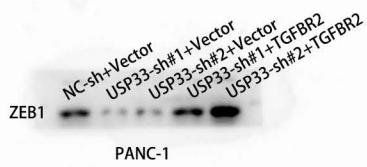

Fig4J

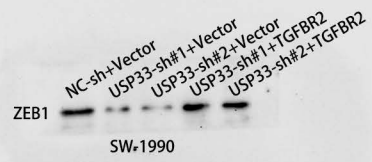



Fig4J

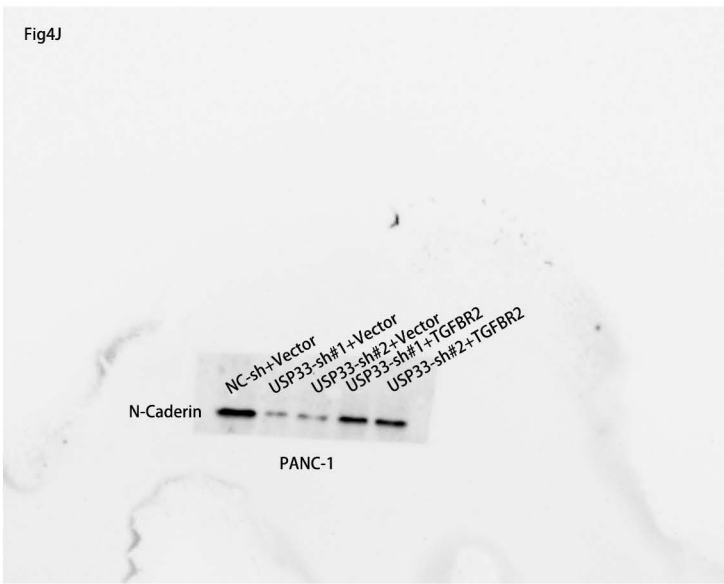

Fig4J

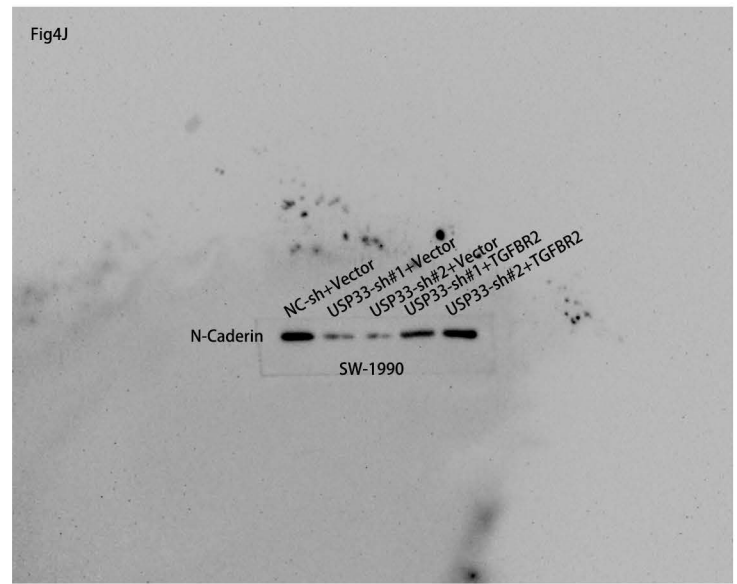

Fig4J

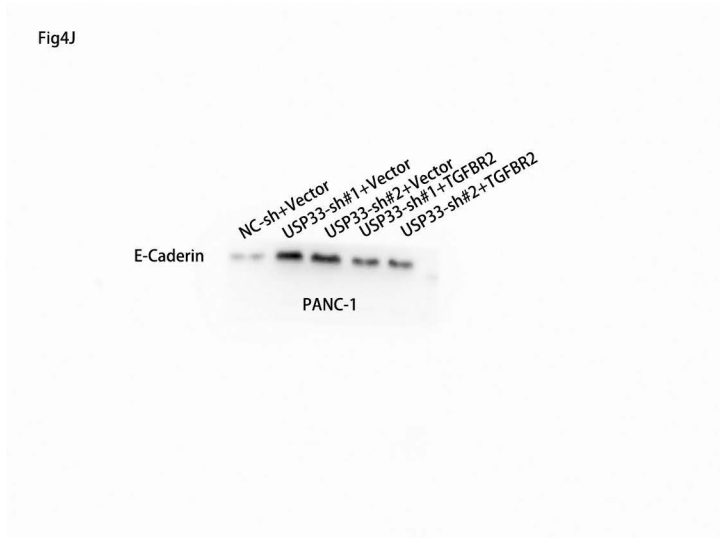

Fig4J

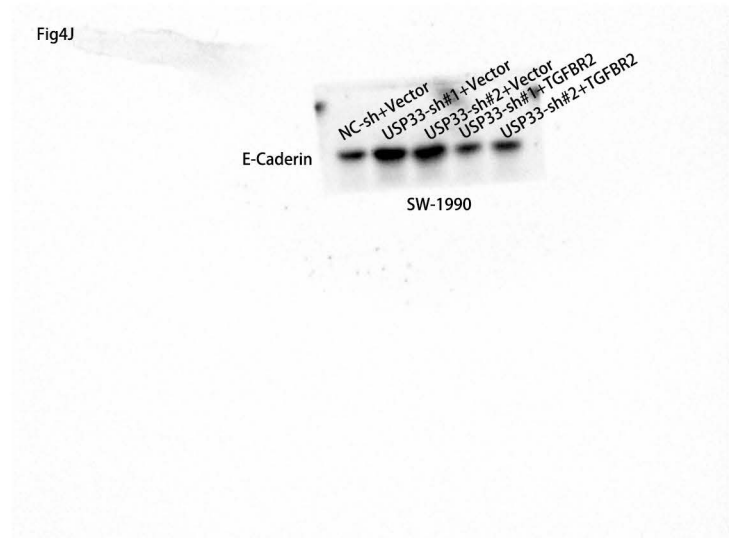

Fig4J

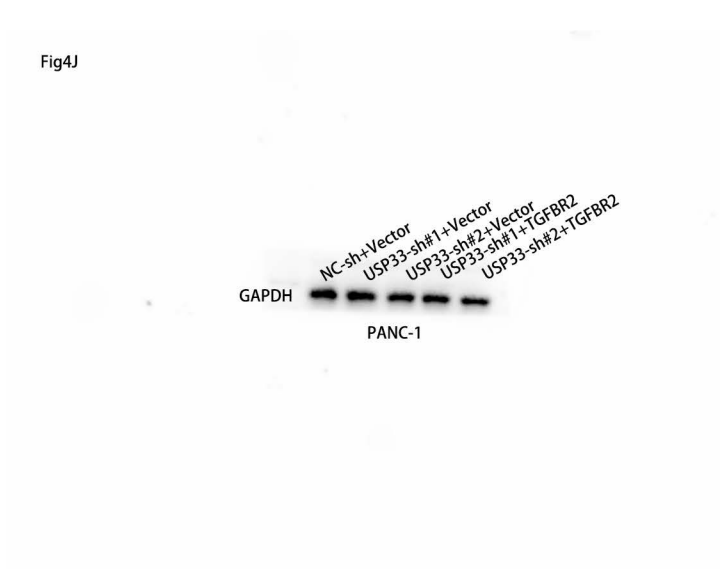

Fig4J

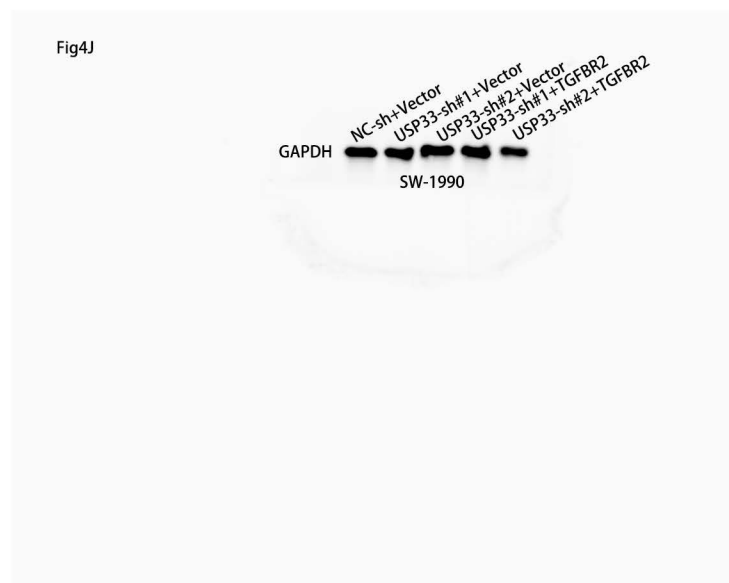

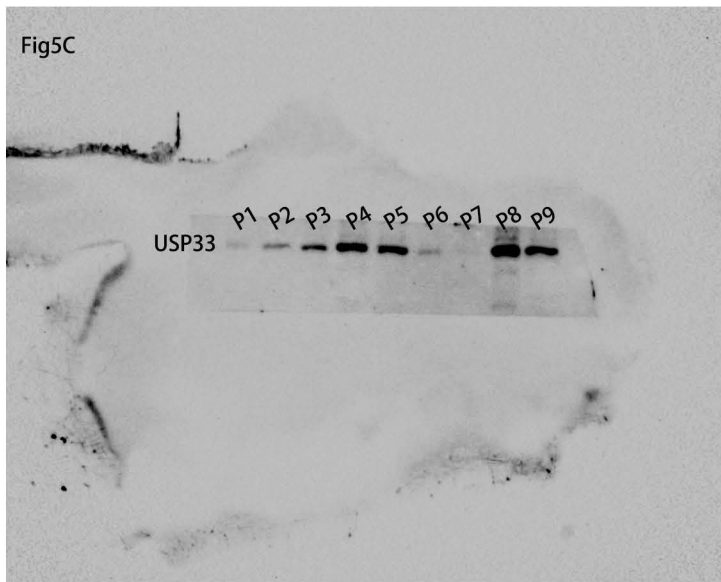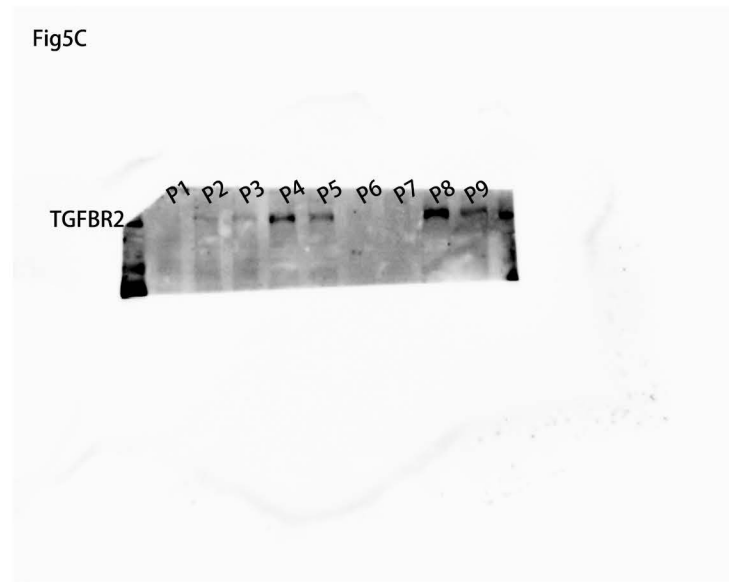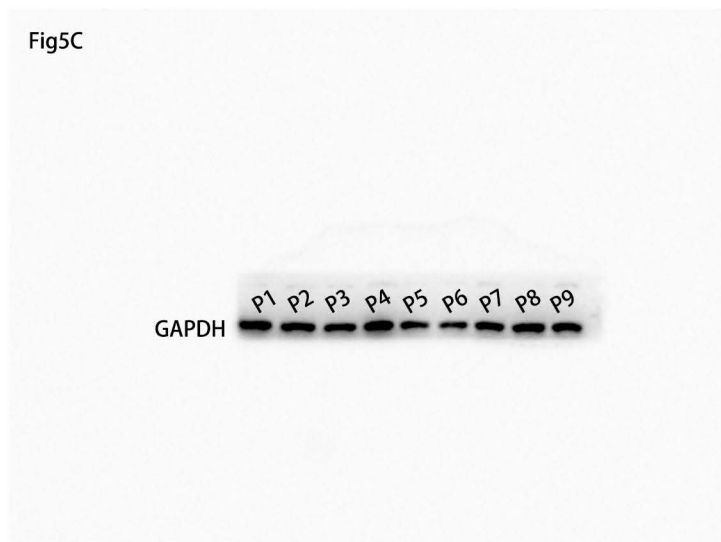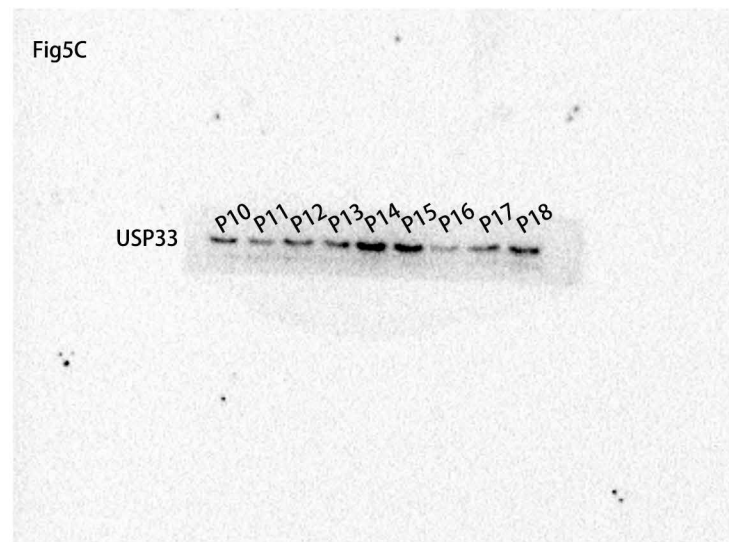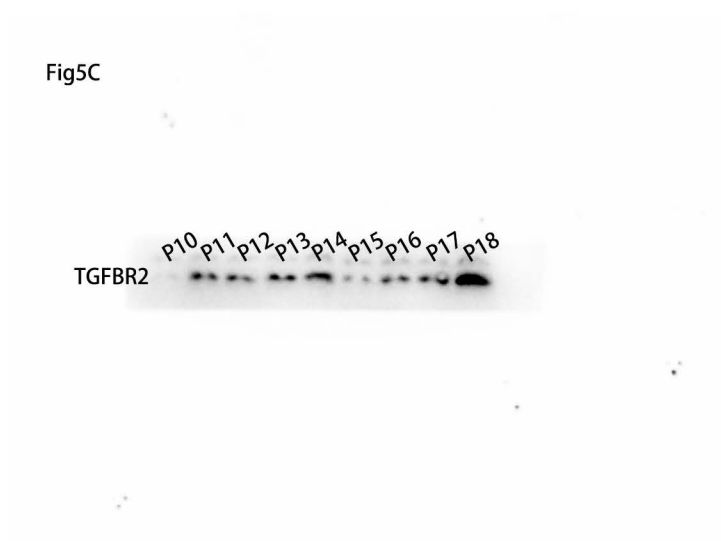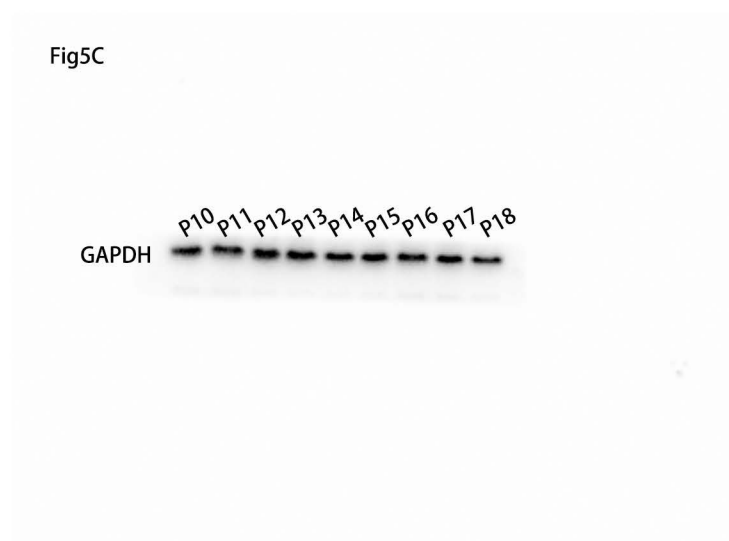

Fig5F

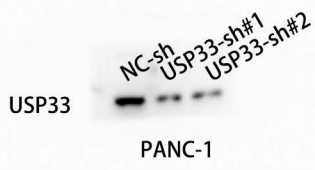

Fig5F

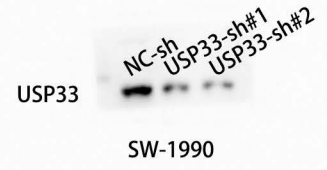

Fig5F

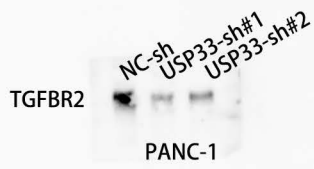

Fig5F

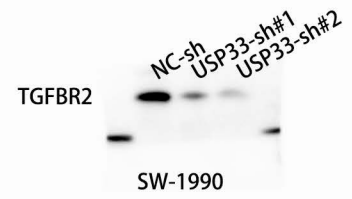

Fig5F

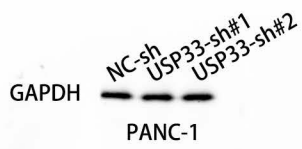

Fig5F

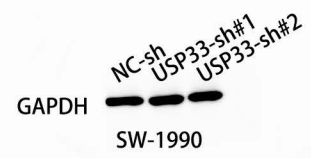

Fig5F

USP33 NC-OE USP33  
PANC-1



Fig5F

USP33 NC-OE USP33  
SW-1990



Fig5F

TGFBR2 NC-OE USP33  
PANC-1

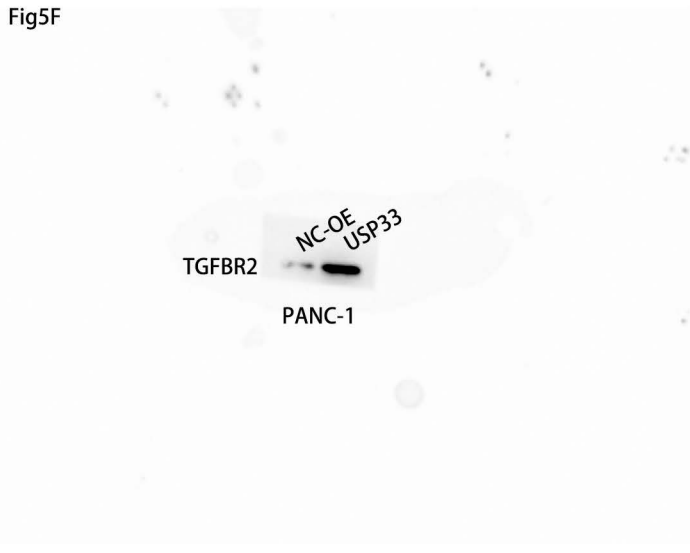

Fig5F

TGFBR2 NC-OE USP33  
SW-1990

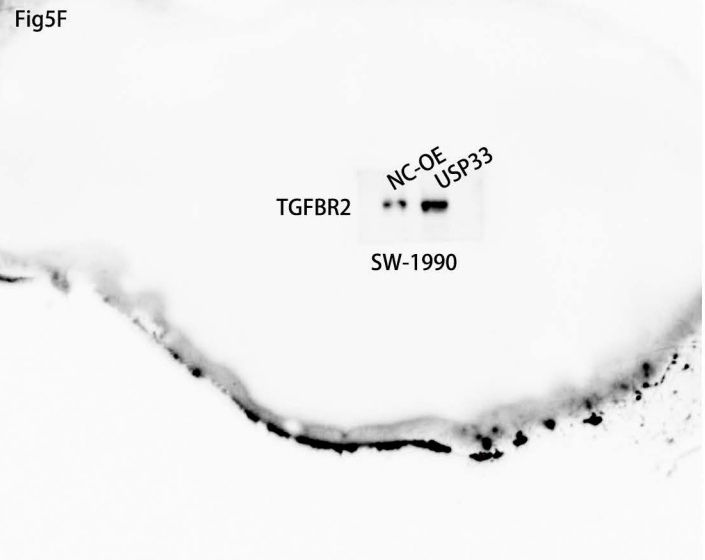

Fig5F

GAPDH NC-OE USP33  
PANC-1

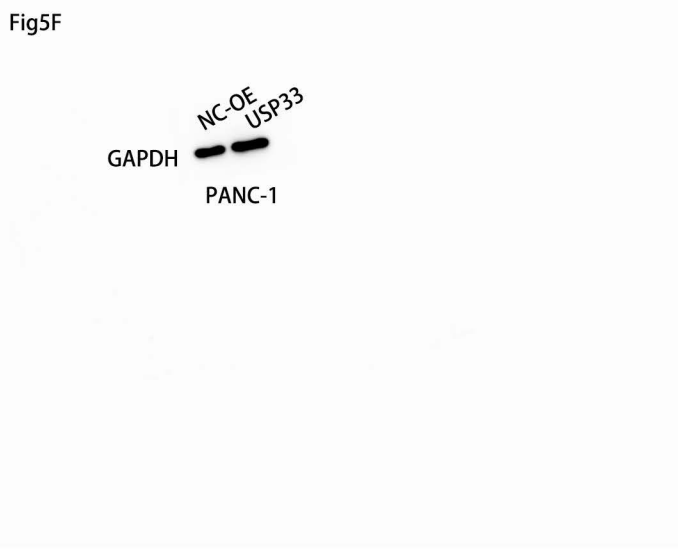

Fig5F

GAPDH NC-OE USP33  
SW-1990

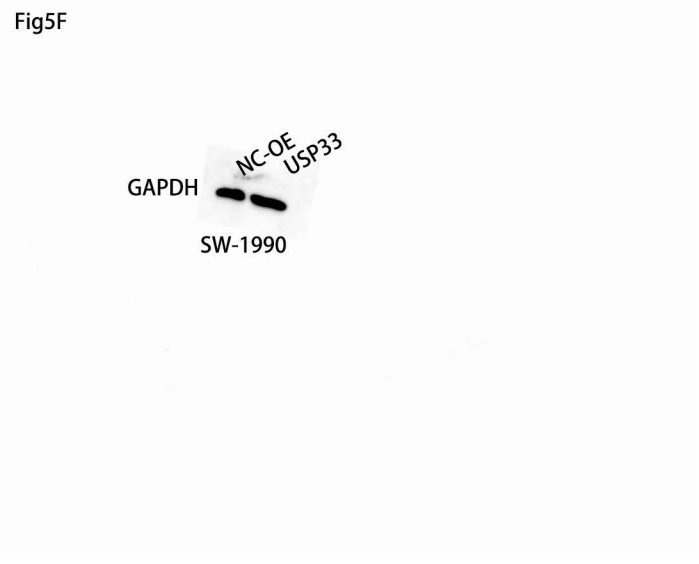

Fig5G

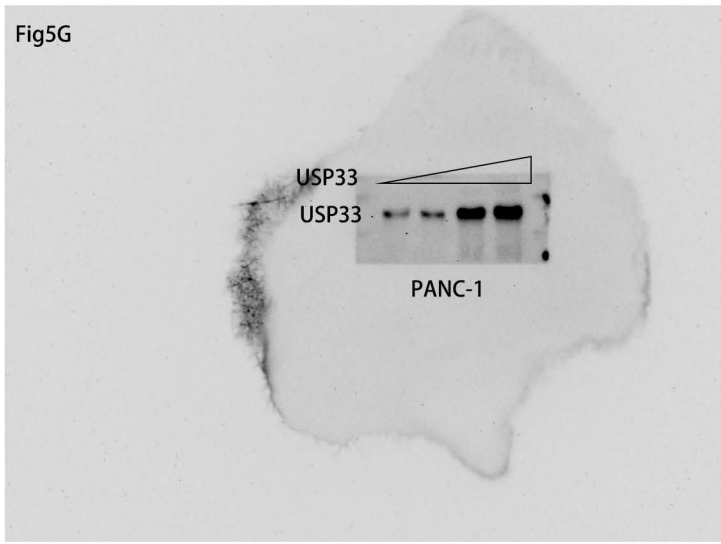

Fig5G

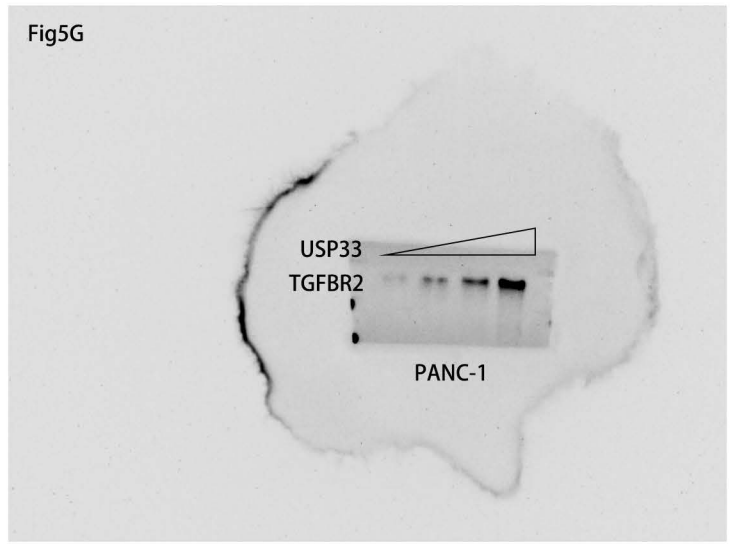

Fig5G

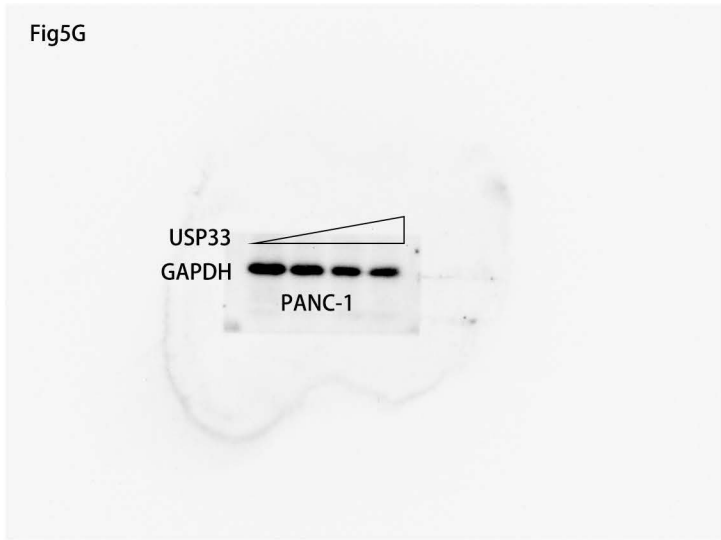

Fig5G

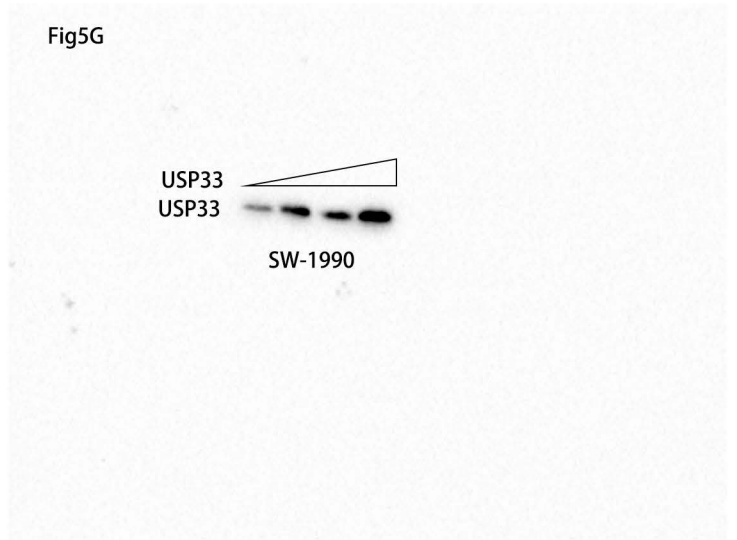

Fig5G

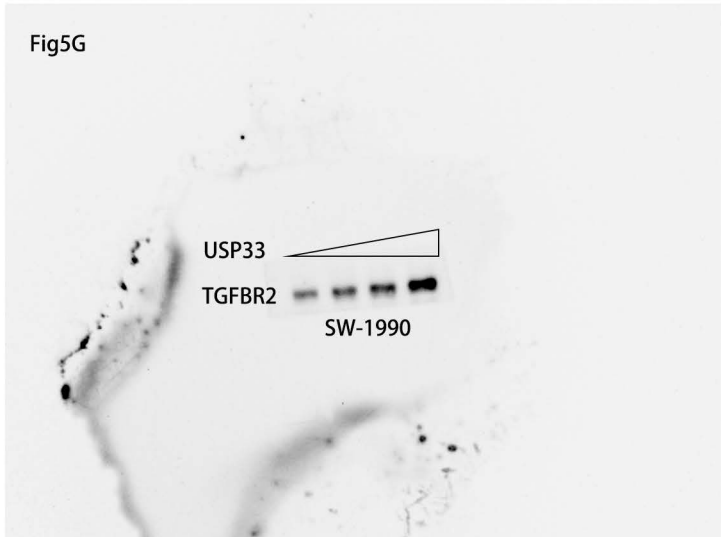

Fig5G

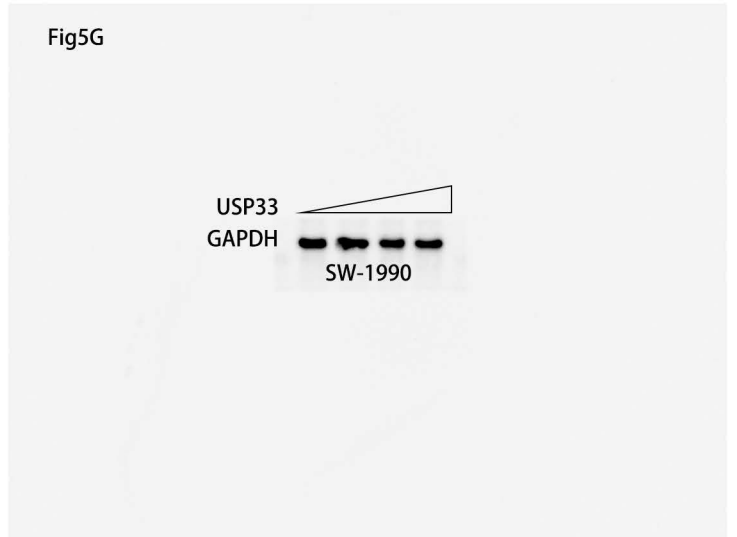

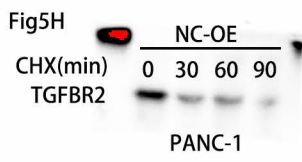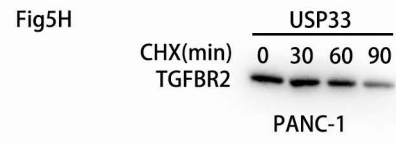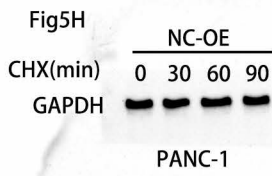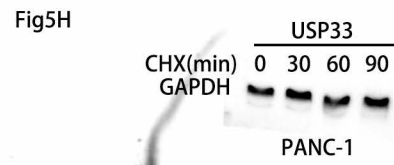

Fig5H

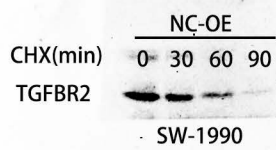

Fig5H

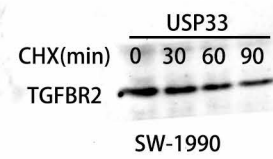

Fig5H

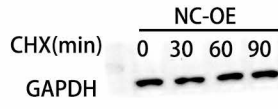

Fig5H

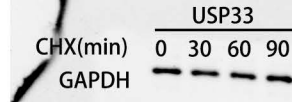

Fig5J

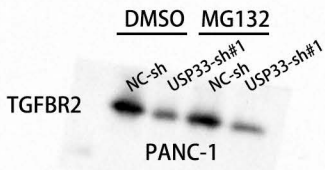

Fig5J

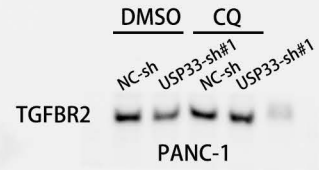

Fig5J

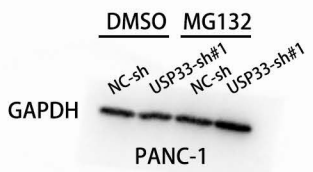

Fig5J

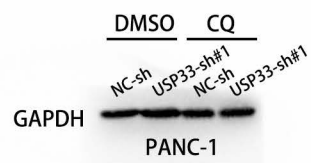

Fig5J

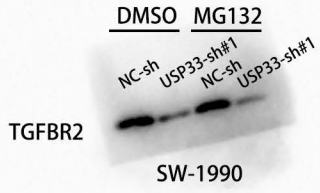

Fig5J

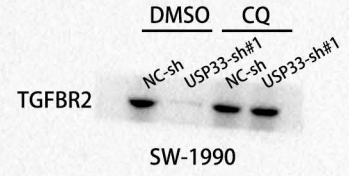

Fig5J

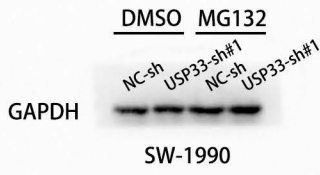

Fig5J

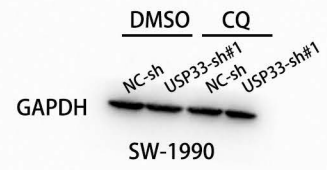

Fig5L

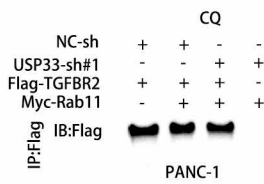

Fig5L

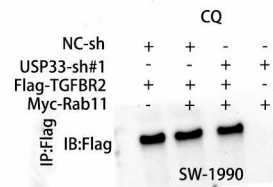



Fig5L

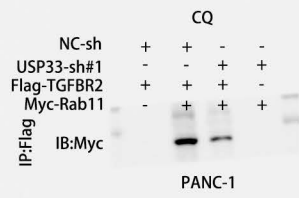

Fig5L

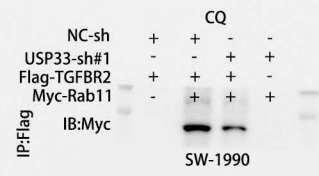

Fig5L

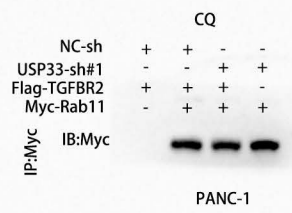

Fig5L

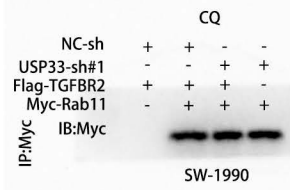

Fig5L

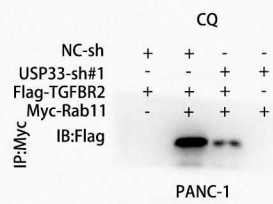

Fig5L

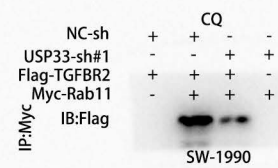

Fig5L

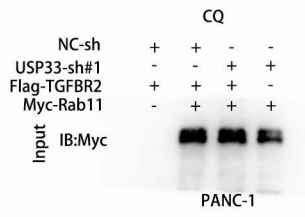

Fig5L

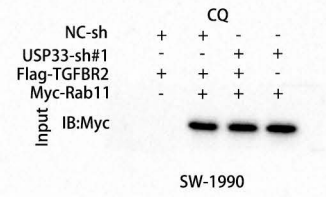

Fig5L

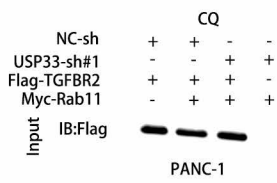

Fig5L

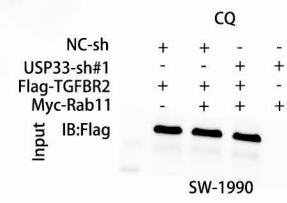

Fig5L

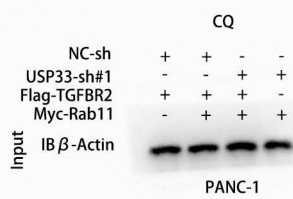

Fig5L

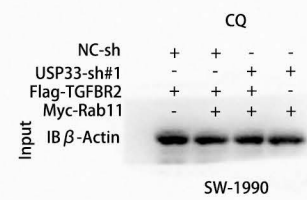

Fig5M

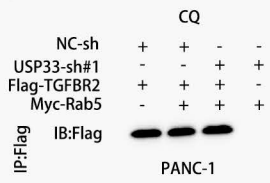

Fig5M

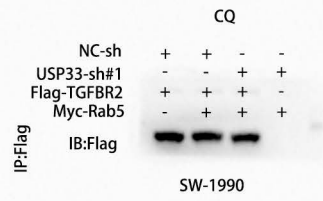

Fig5M

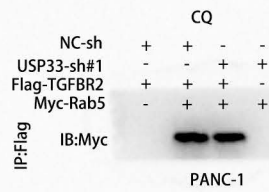

Fig5M

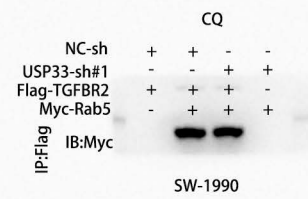

Fig5M

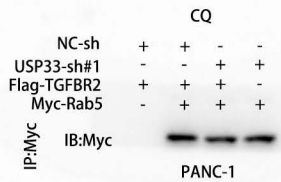

Fig5M

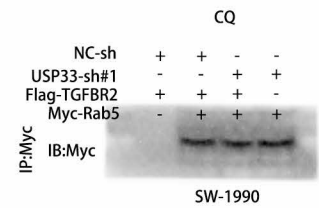

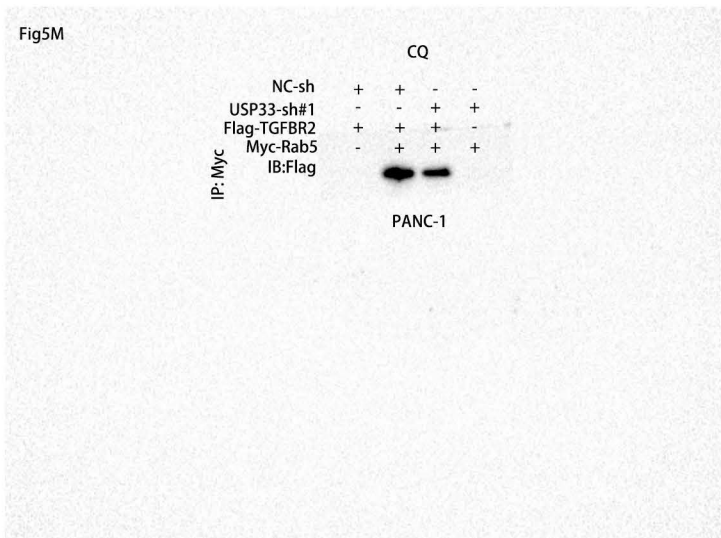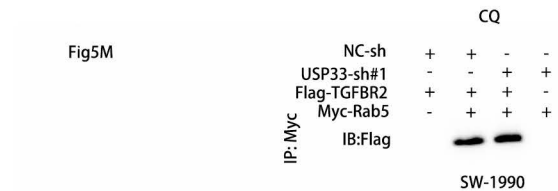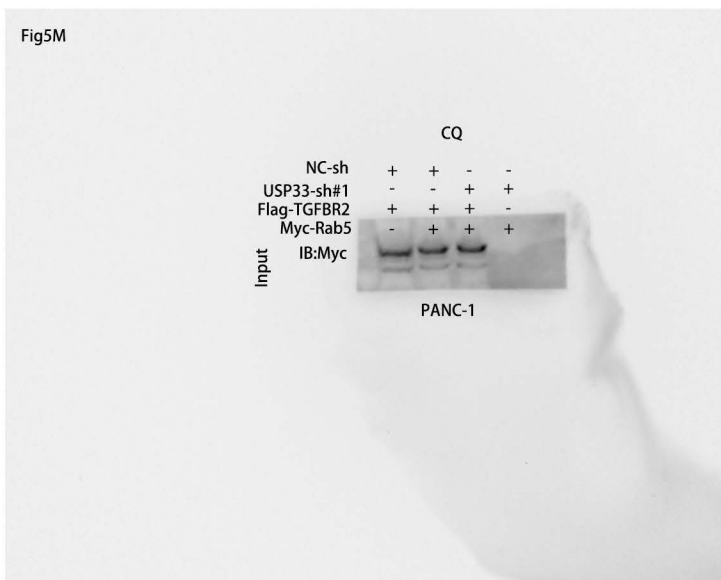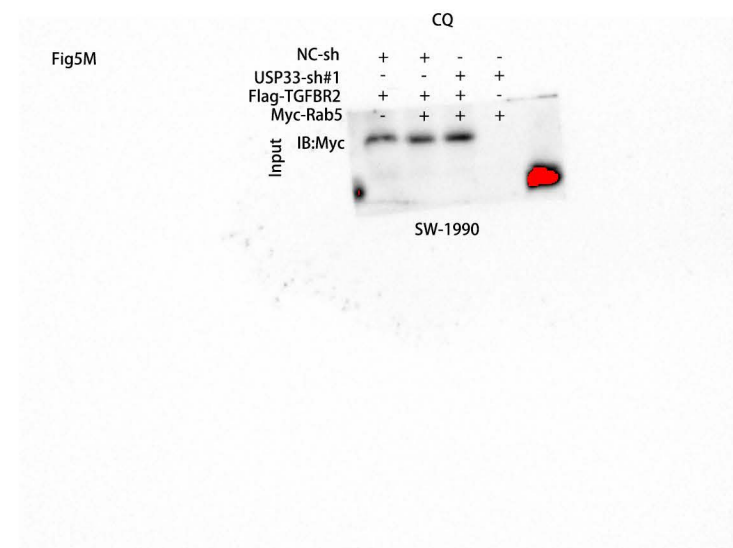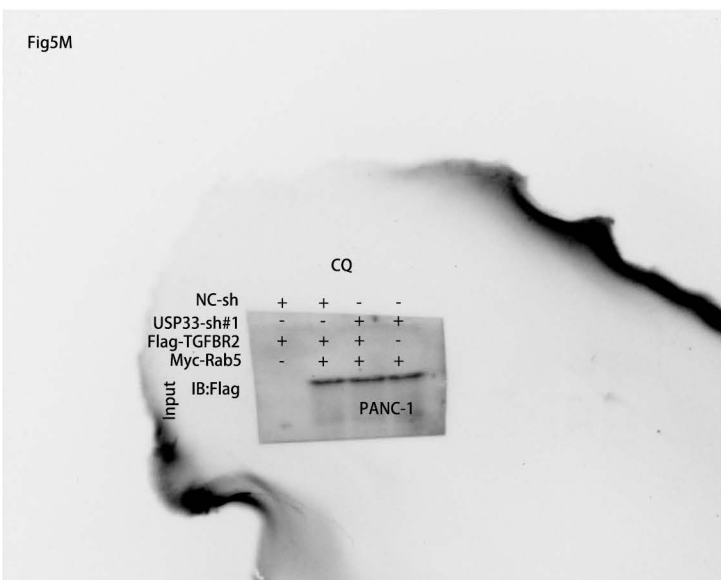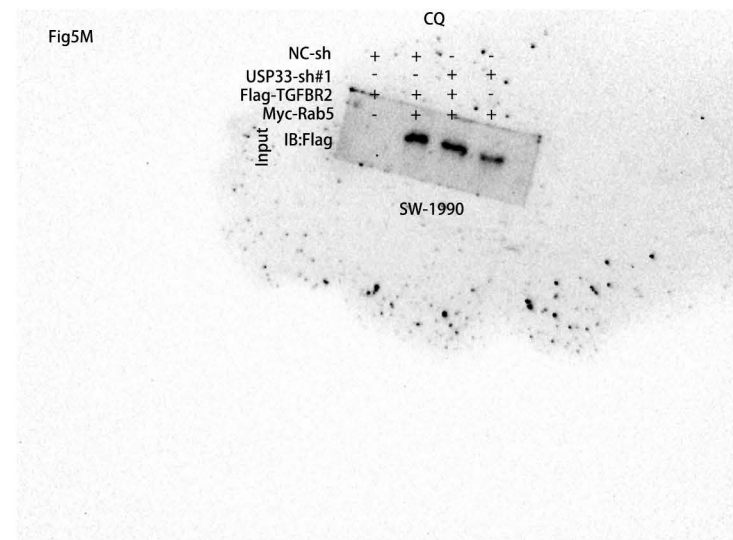

Fig5M

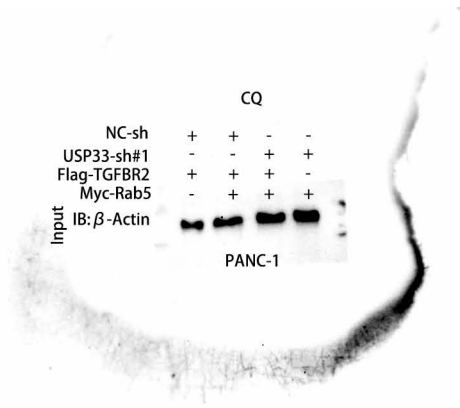

Fig5M

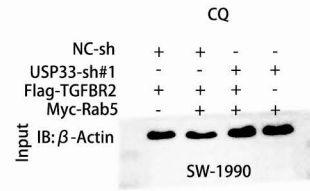

Fig5N

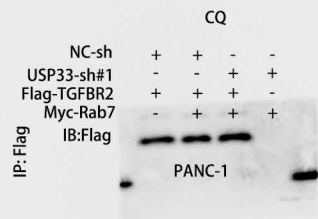

Fig5N

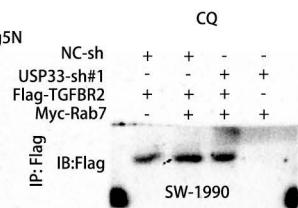

Fig5N

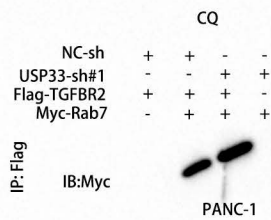

Fig5N

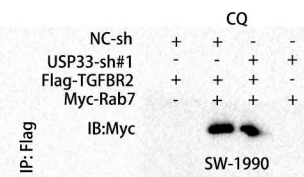

Fig5N

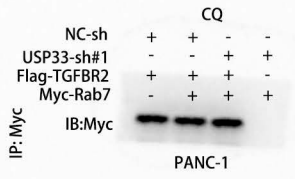

Fig5N

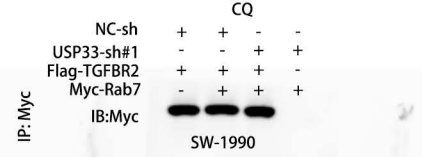

Fig5N

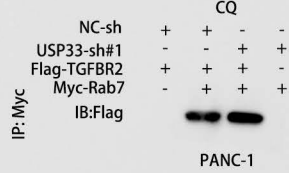

Fig5N

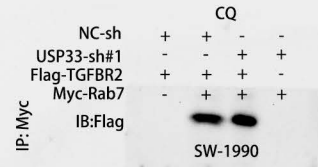

Fig5N

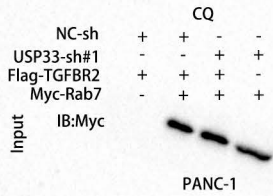

Fig5N

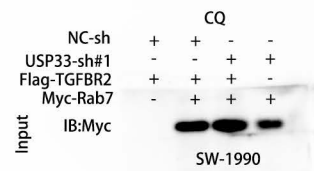

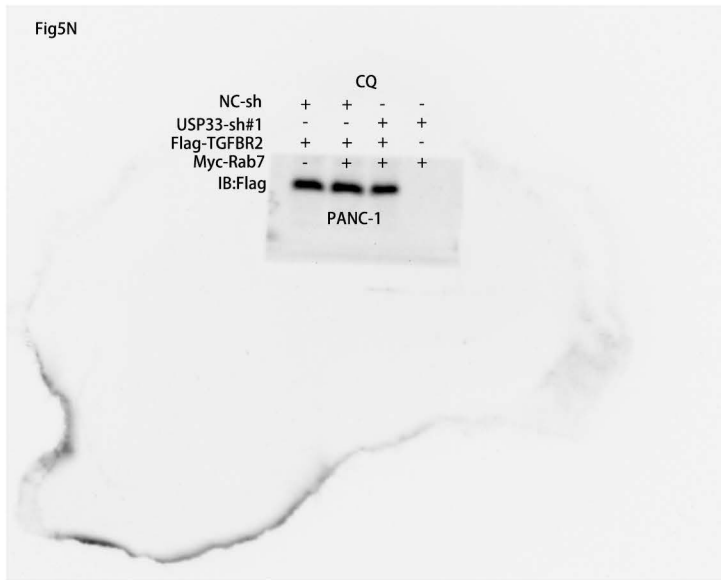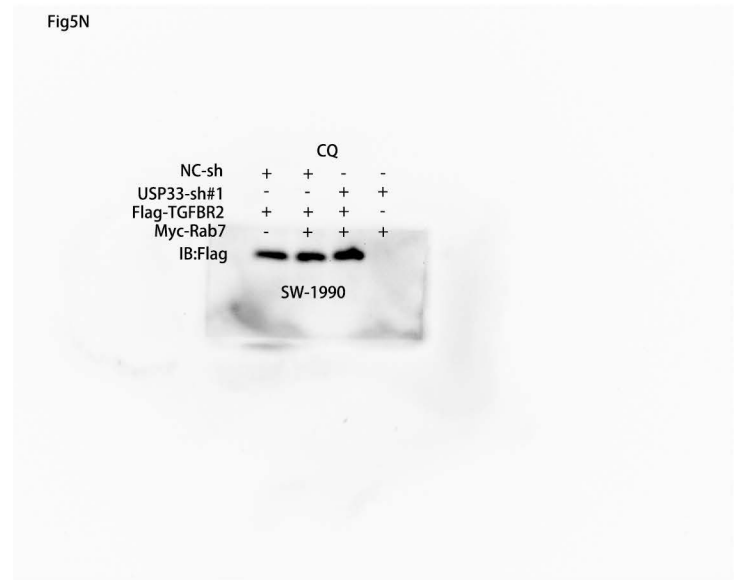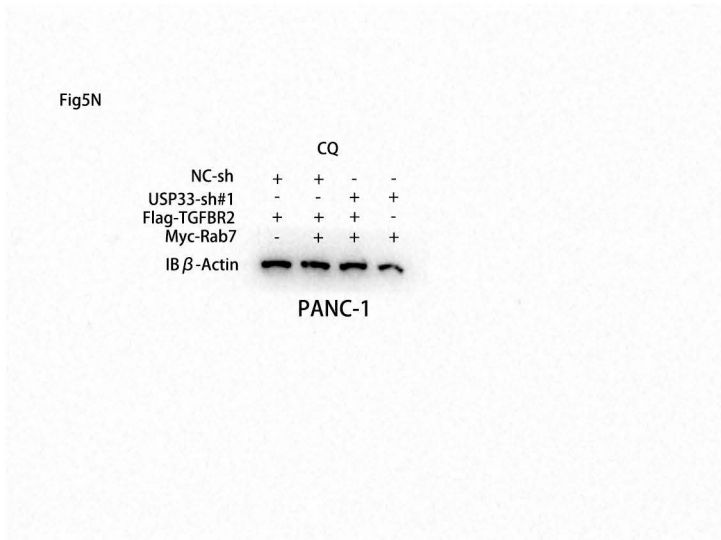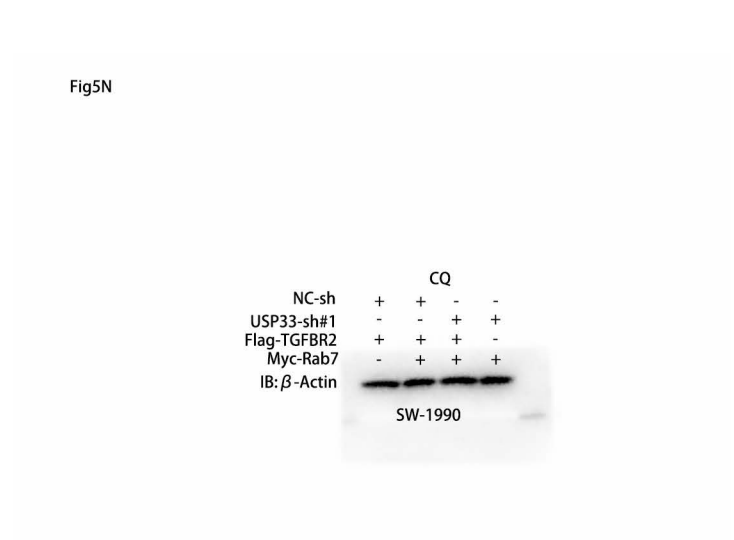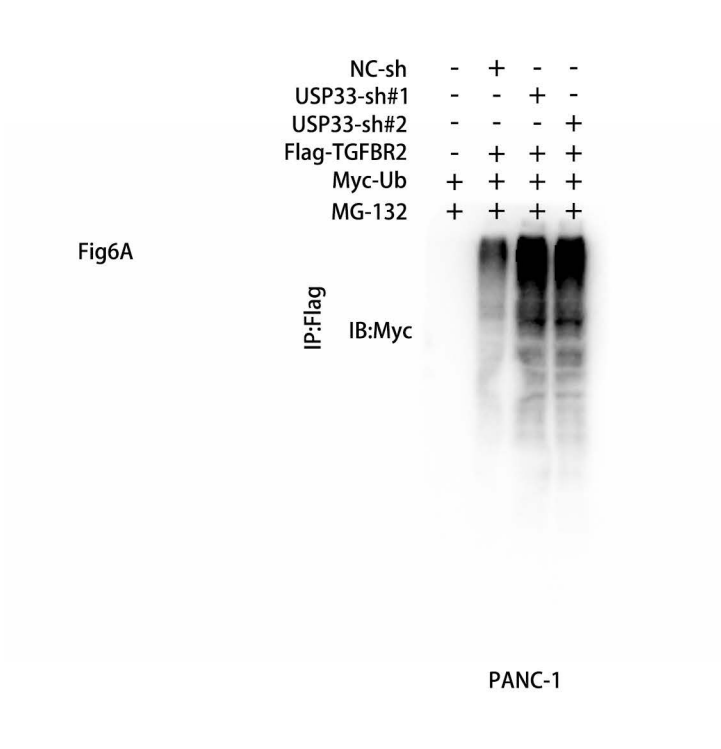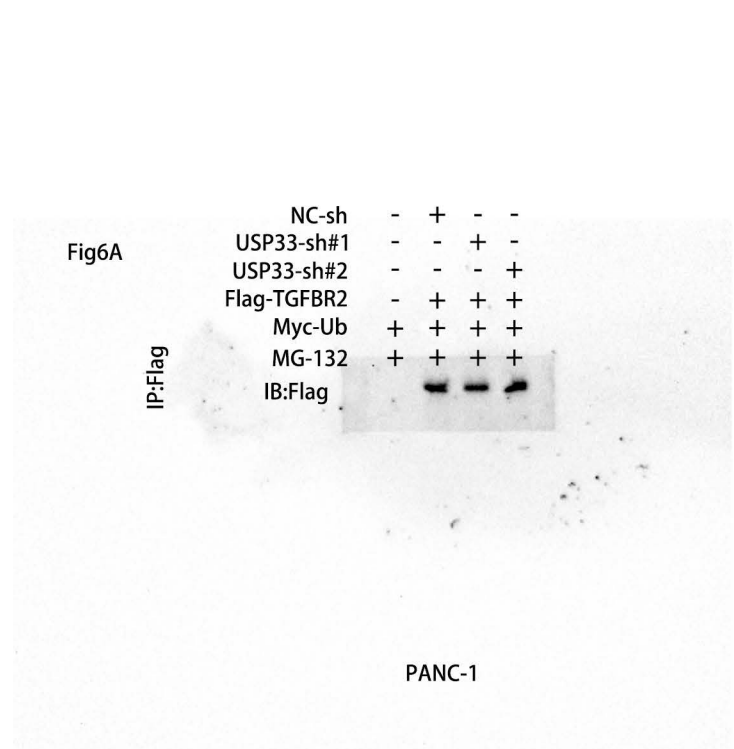

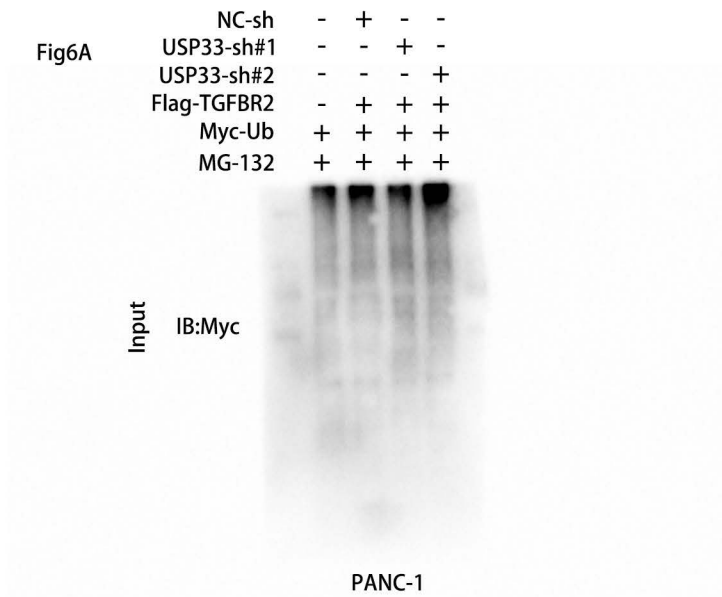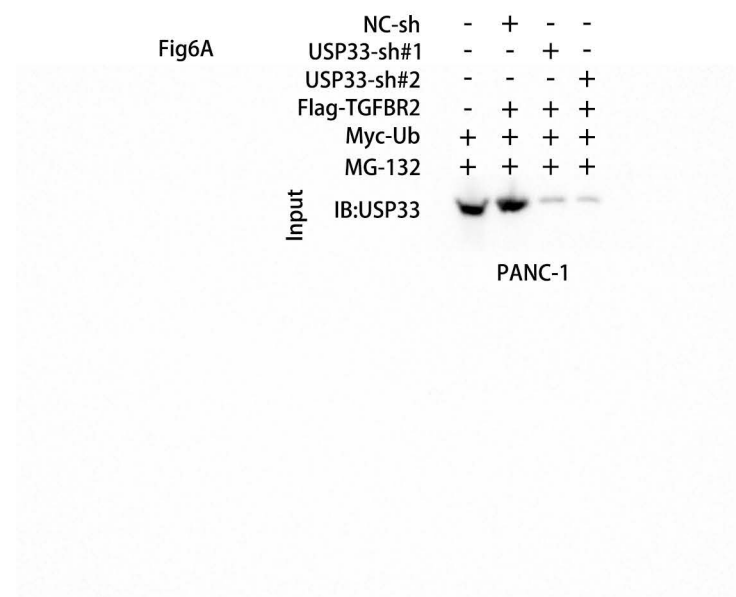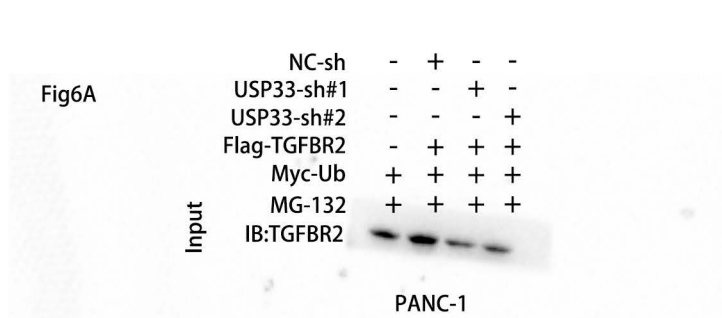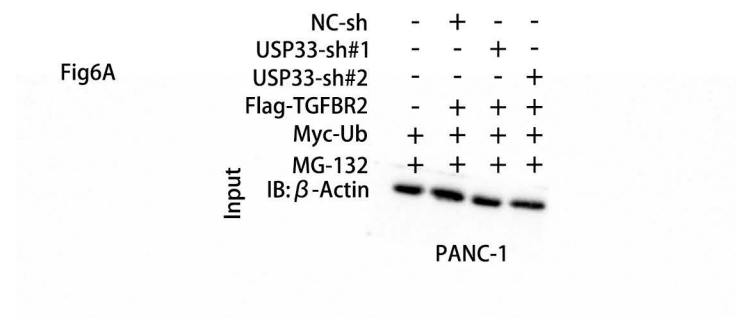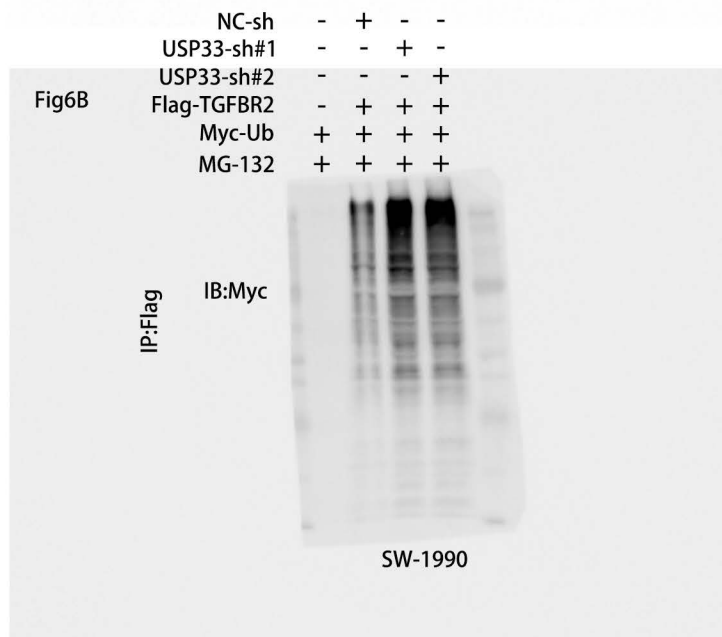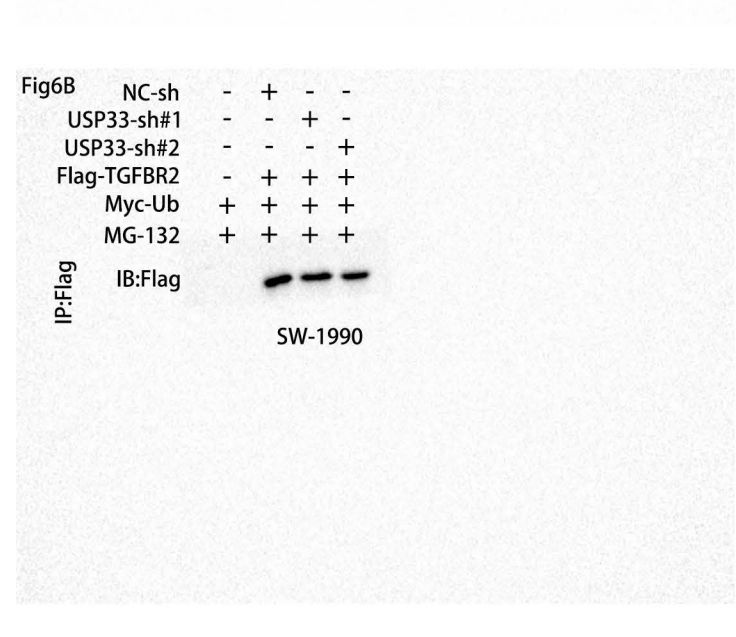



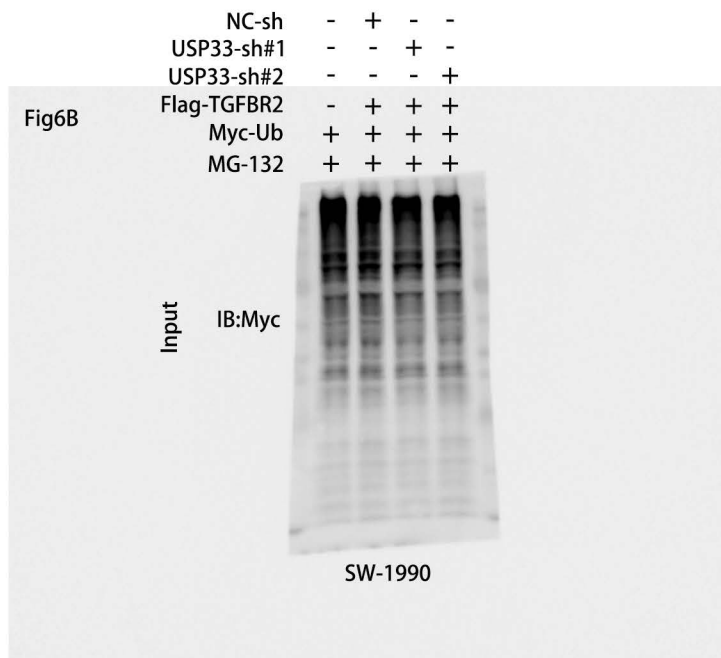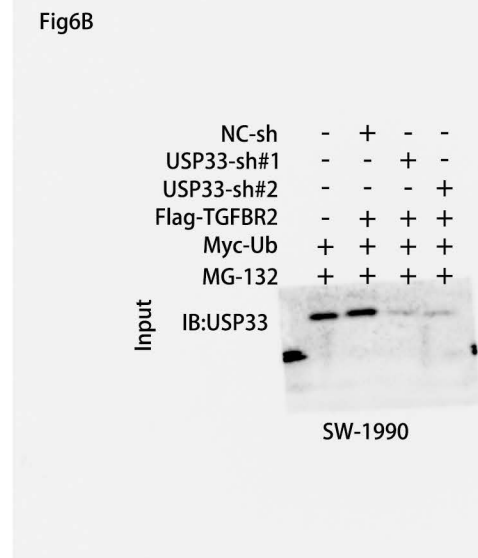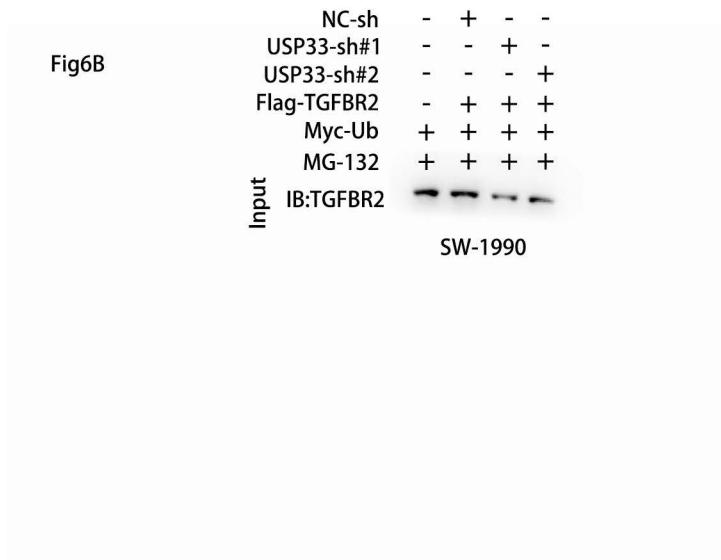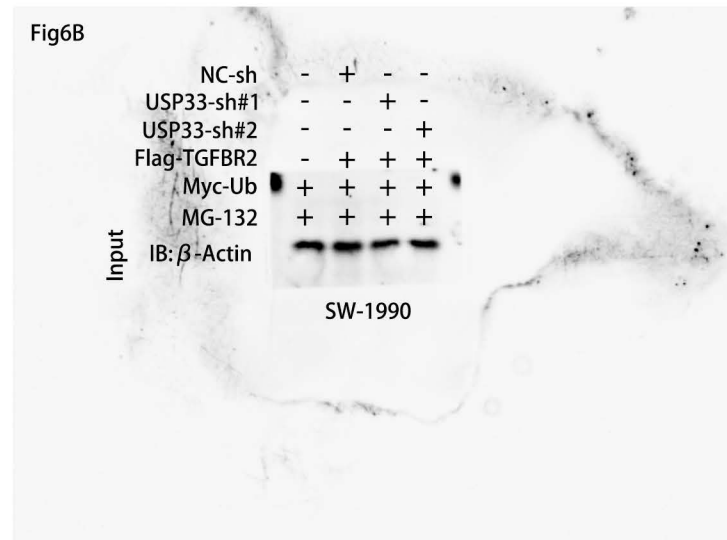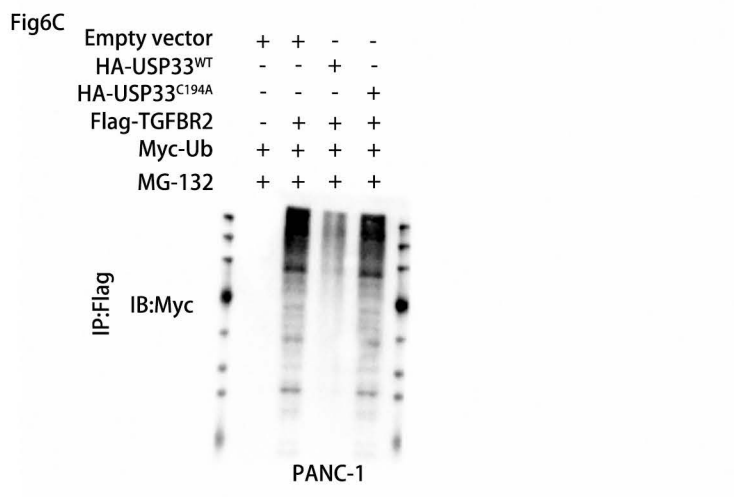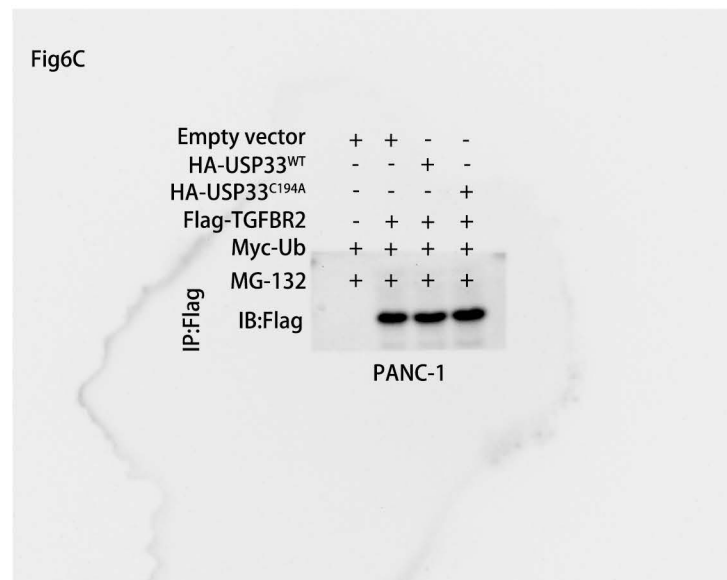

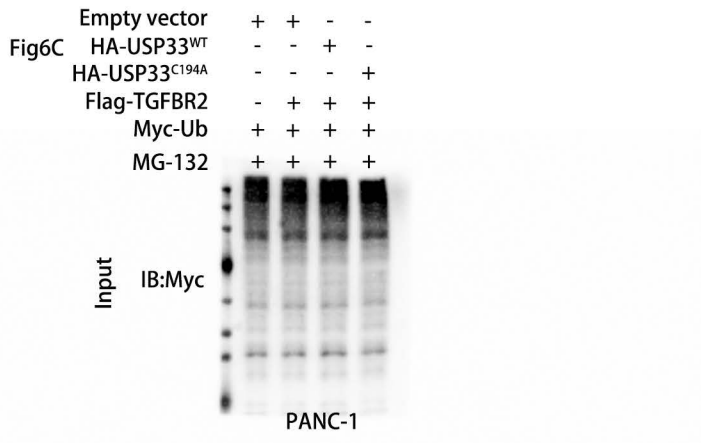

Fig6C

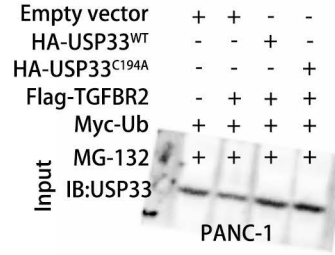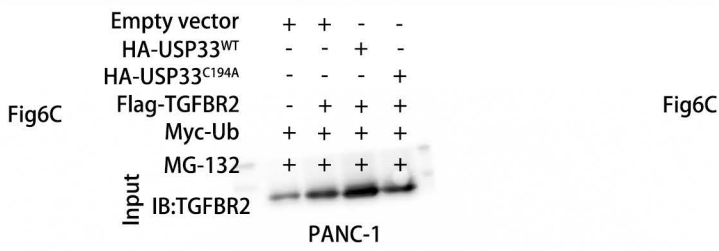

Fig6C

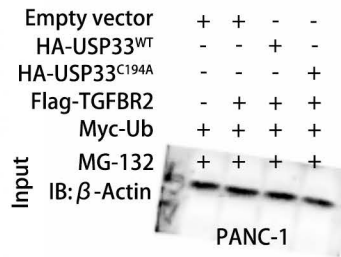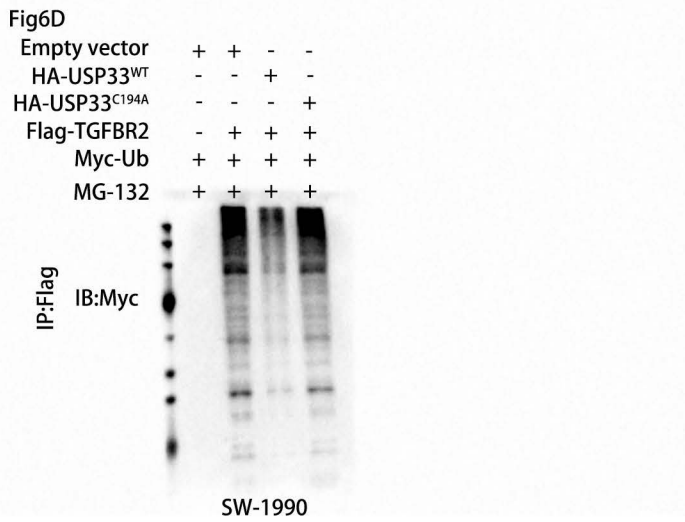

Fig6D

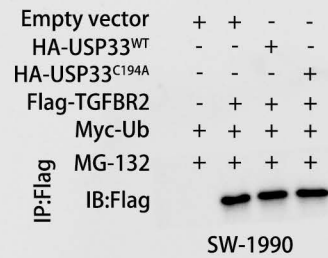

Fig6D

|                           |   |   |   |   |
|---------------------------|---|---|---|---|
| Empty vector              | + | + | - | - |
| HA-USP33 <sup>WT</sup>    | - | - | + | - |
| HA-USP33 <sup>C194A</sup> | - | - | - | + |
| Flag-TGFBR2               | - | + | + | + |
| Myc-Ub                    | + | + | + | + |
| MG-132                    | + | + | + | + |

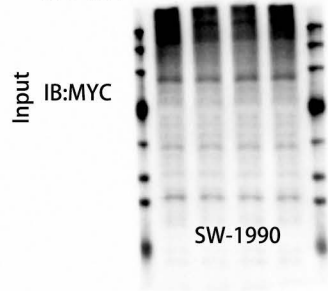

Fig6D

|                           |   |   |   |   |
|---------------------------|---|---|---|---|
| Empty vector              | + | + | - | - |
| HA-USP33 <sup>WT</sup>    | - | - | + | - |
| HA-USP33 <sup>C194A</sup> | - | - | - | + |
| Flag-TGFBR2               | - | + | + | + |
| Myc-Ub                    | + | + | + | + |
| MG-132                    | + | + | + | + |

Input IB:USP33

SW-1990

Fig6D

|                           |   |   |   |   |
|---------------------------|---|---|---|---|
| Empty vector              | + | + | - | - |
| HA-USP33 <sup>WT</sup>    | - | - | + | - |
| HA-USP33 <sup>C194A</sup> | - | - | - | + |
| Flag-TGFBR2               | - | + | + | + |
| Myc-Ub                    | + | + | + | + |
| MG-132                    | + | + | + | + |

Input IB:TGFBR2

SW-1990

Fig6D

|                           |   |   |   |   |
|---------------------------|---|---|---|---|
| Empty vector              | + | + | - | - |
| HA-USP33 <sup>WT</sup>    | - | - | + | - |
| HA-USP33 <sup>C194A</sup> | - | - | - | + |
| Flag-TGFBR2               | - | + | + | + |
| Myc-Ub                    | + | + | + | + |
| MG-132                    | + | + | + | + |

Input IB:β-Actin

SW-1990

Fig6E

|             |     |   |
|-------------|-----|---|
| Myc-Ub      | K6R |   |
|             | -   | + |
| Vector      | -   | + |
| HA-USP33    | -   | - |
| Flag-TGFBR2 | -   | + |
| MG-132      | +   | + |

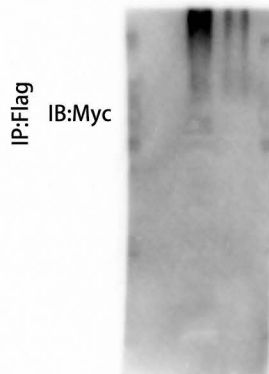

Fig6E

|             |     |   |
|-------------|-----|---|
| Myc-Ub      | K6R |   |
|             | -   | + |
| Vector      | -   | + |
| HA-USP33    | -   | - |
| Flag-TGFBR2 | -   | + |
| MG-132      | +   | + |

IP:Flag IB:Flag

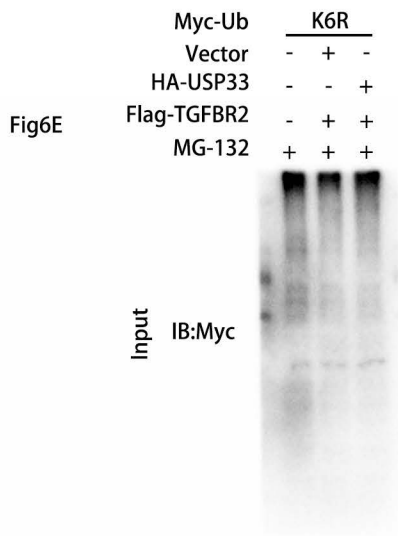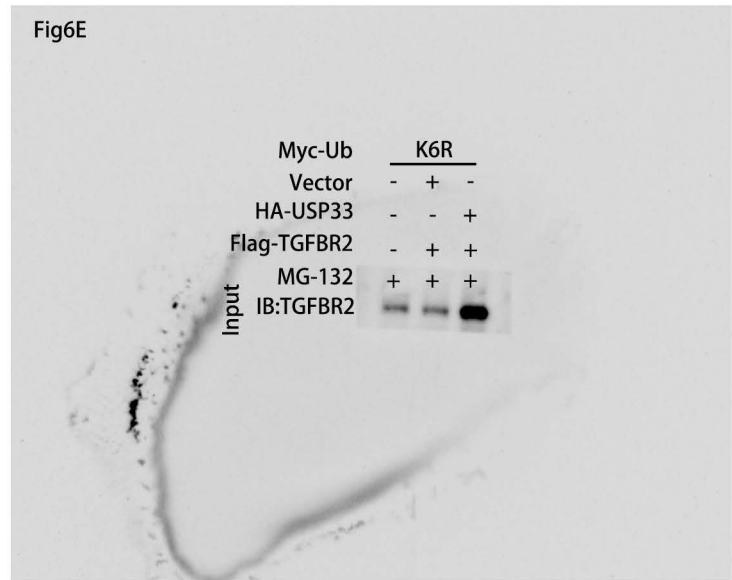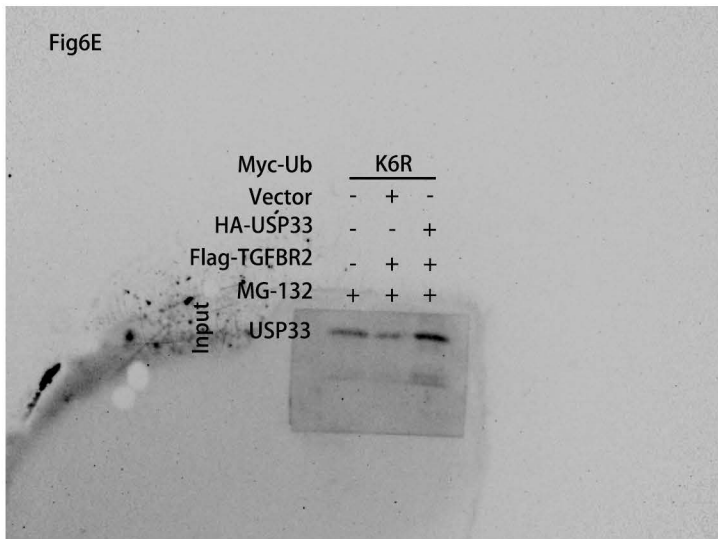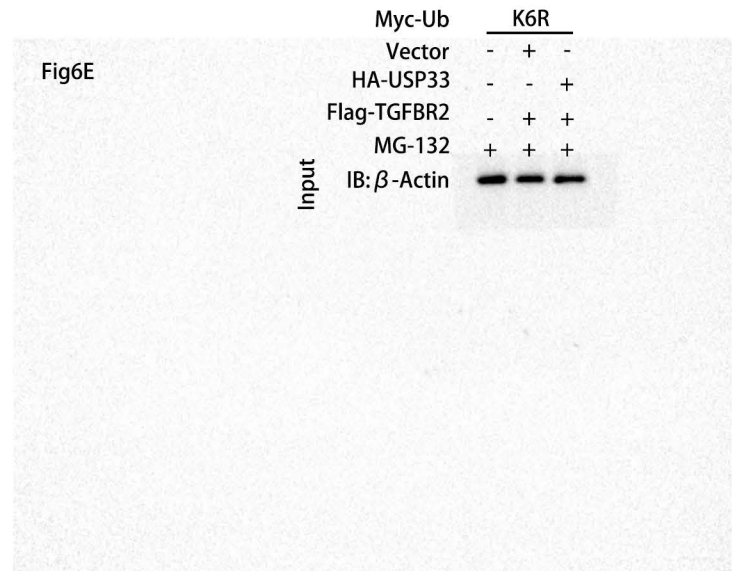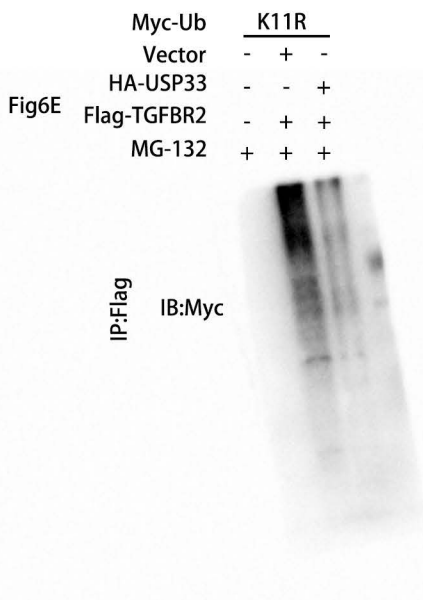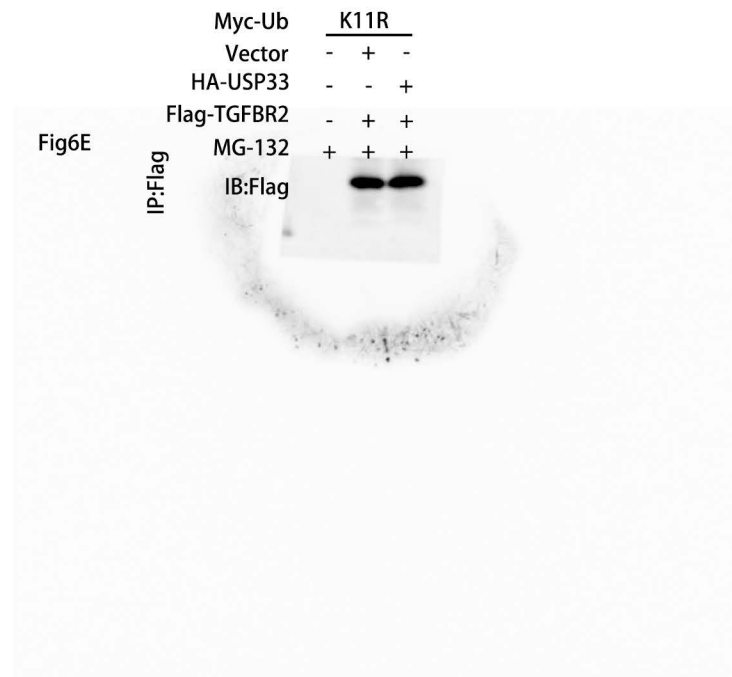

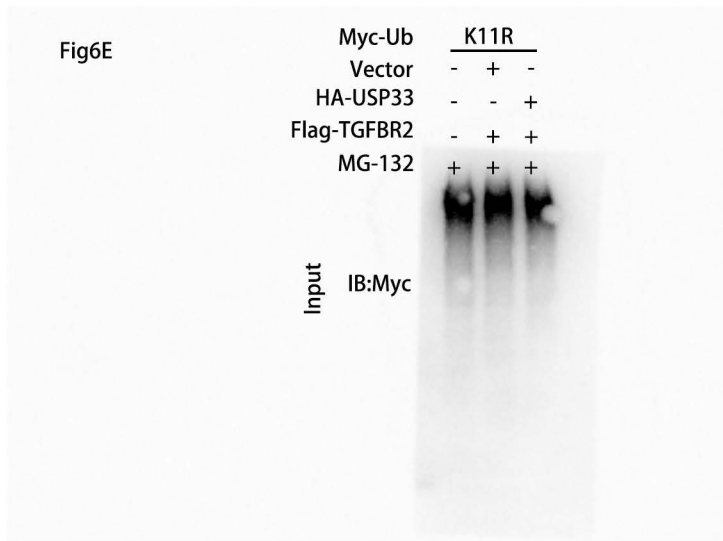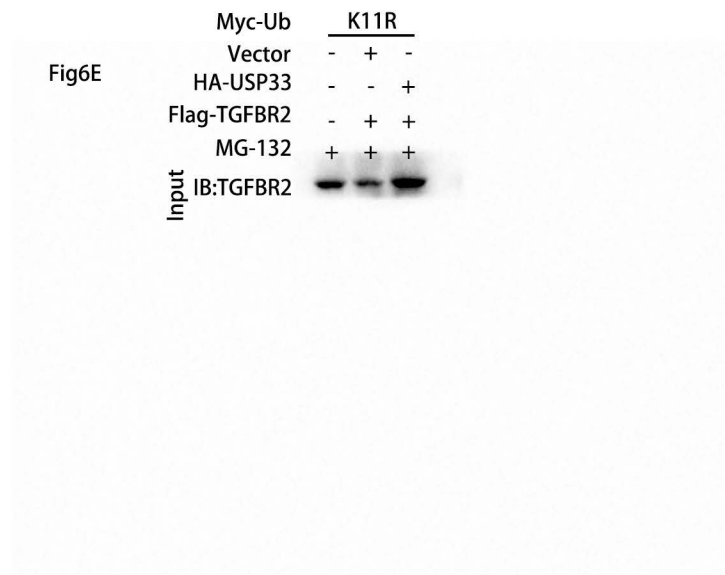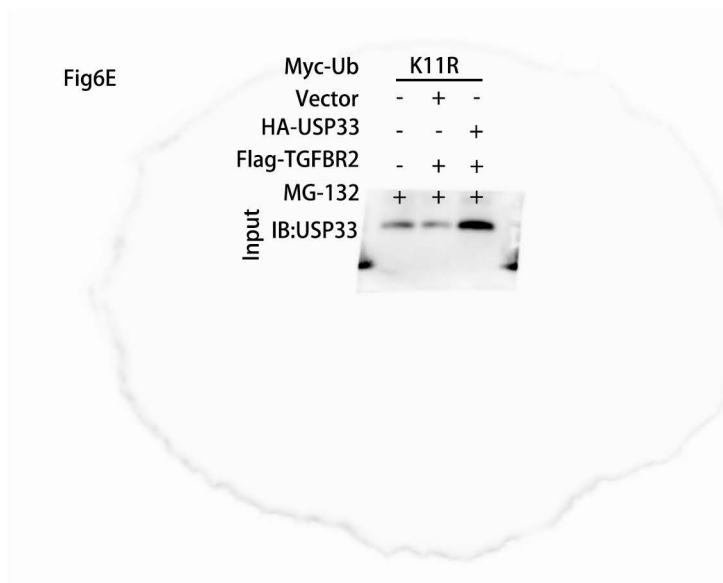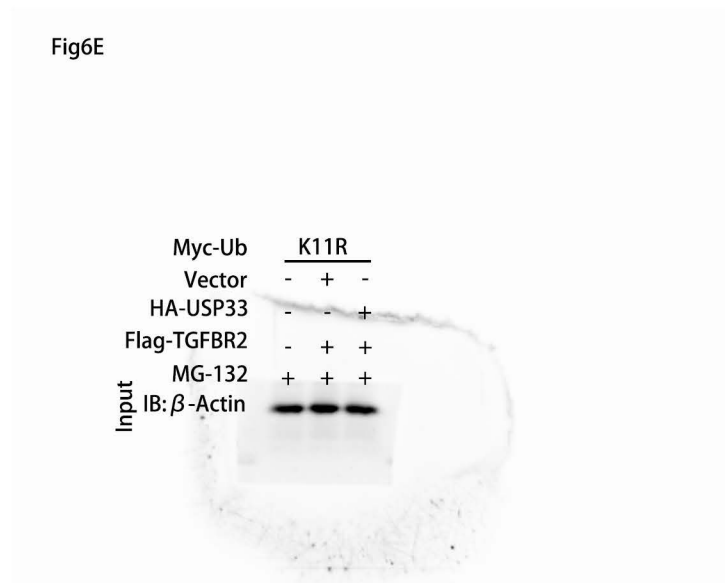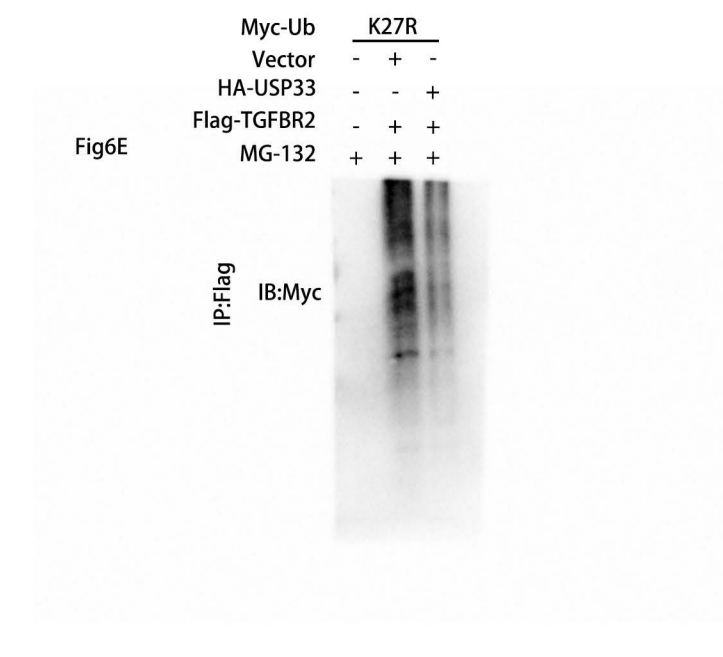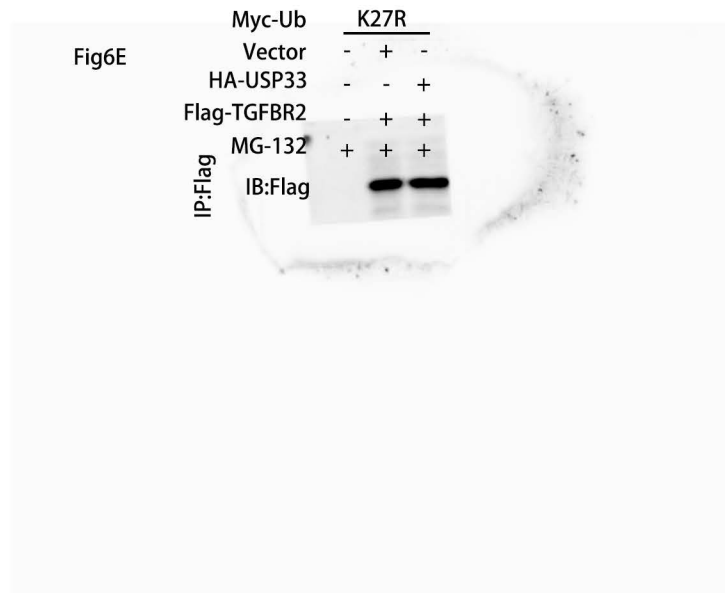

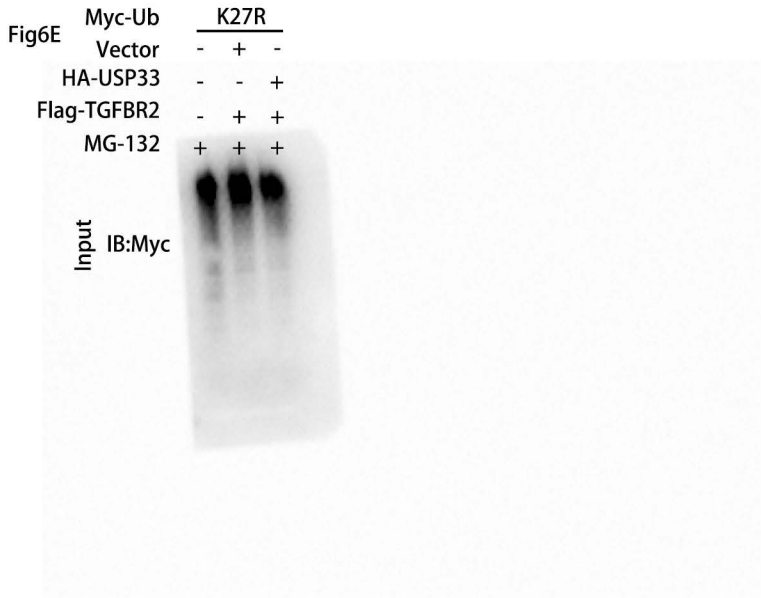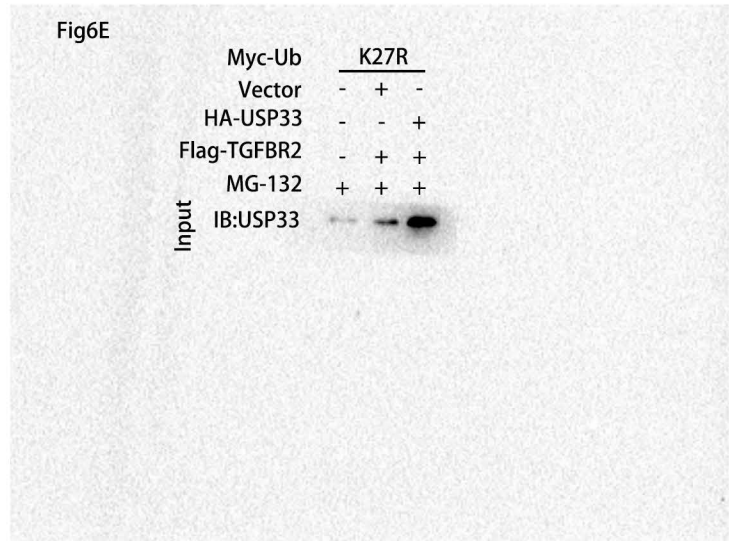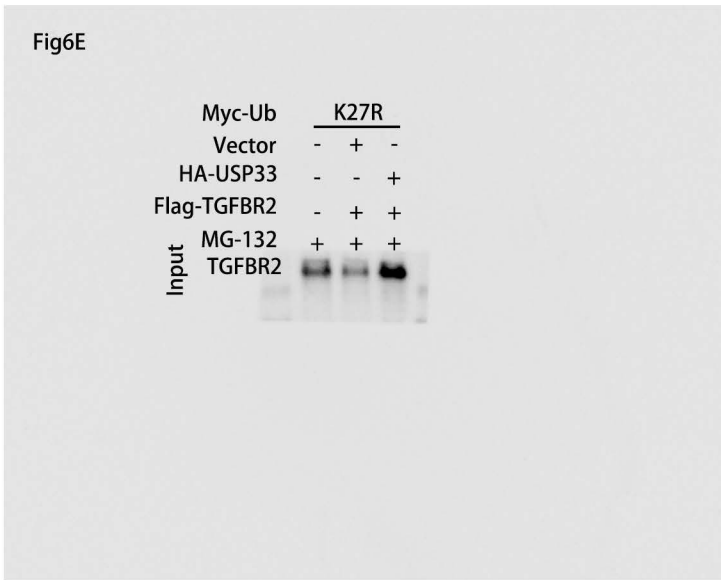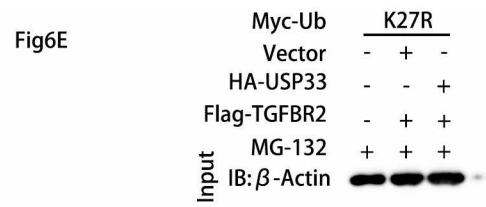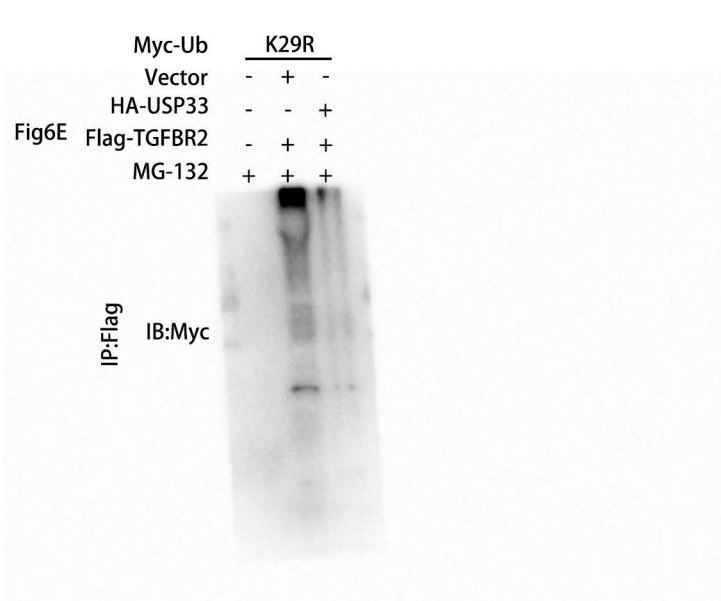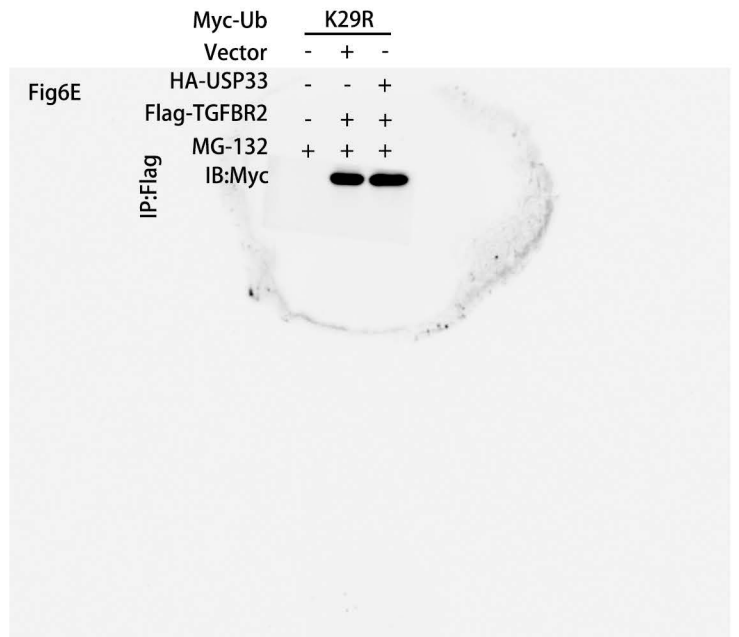

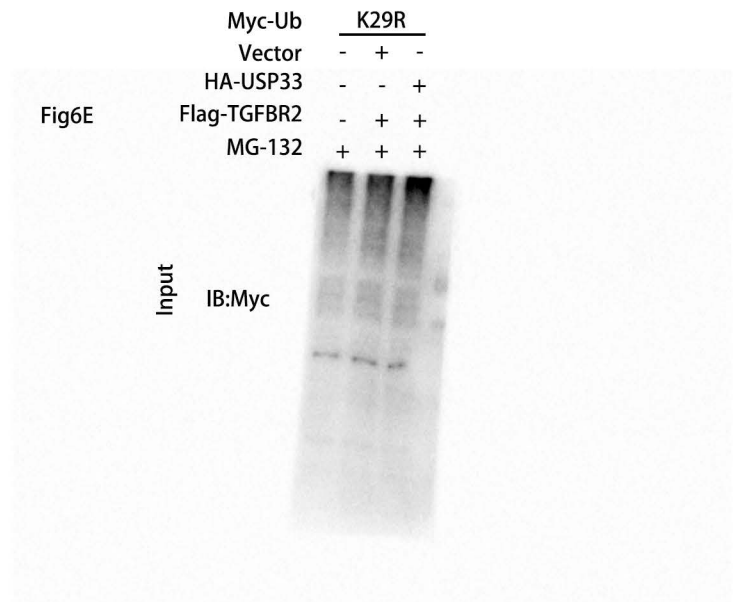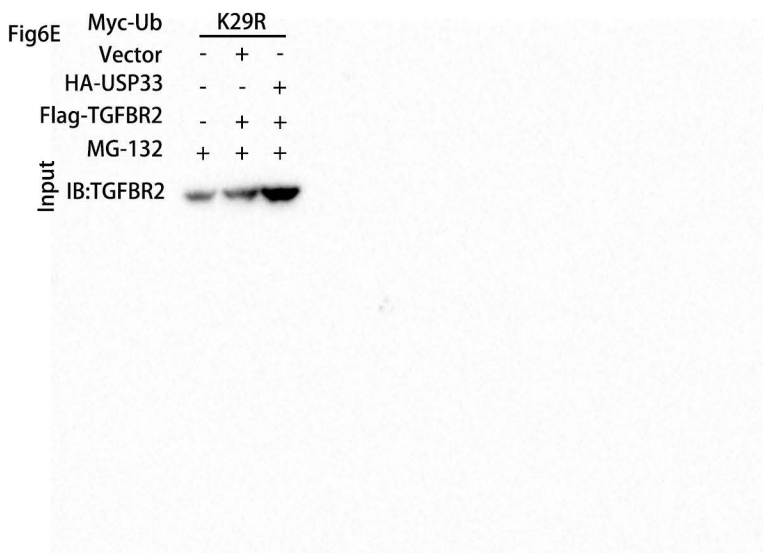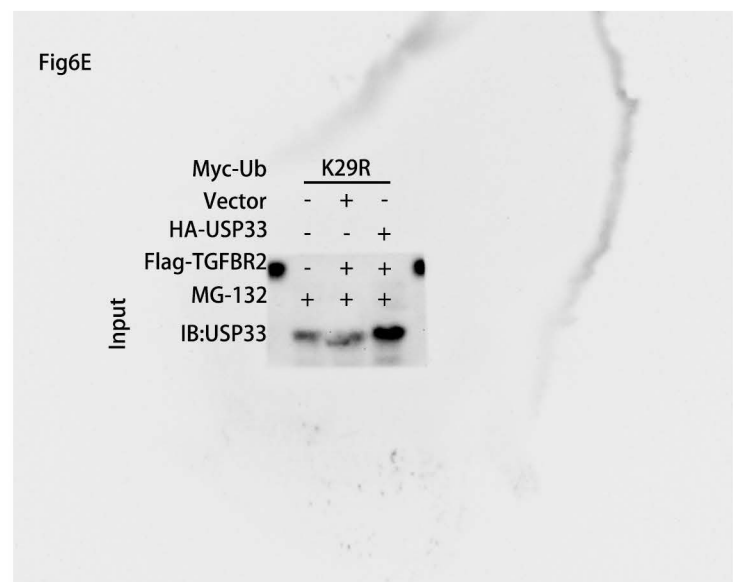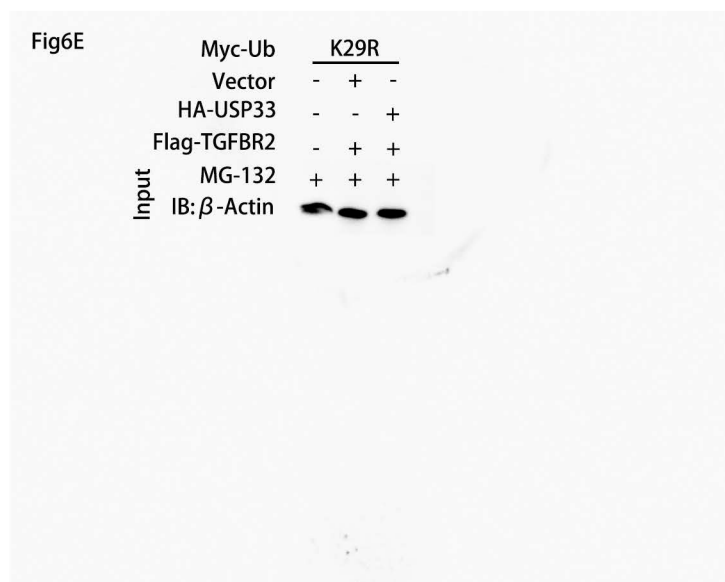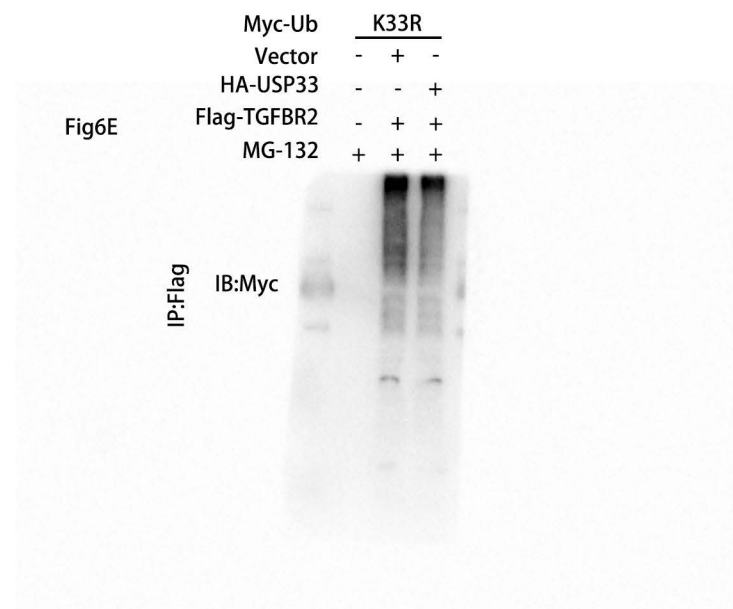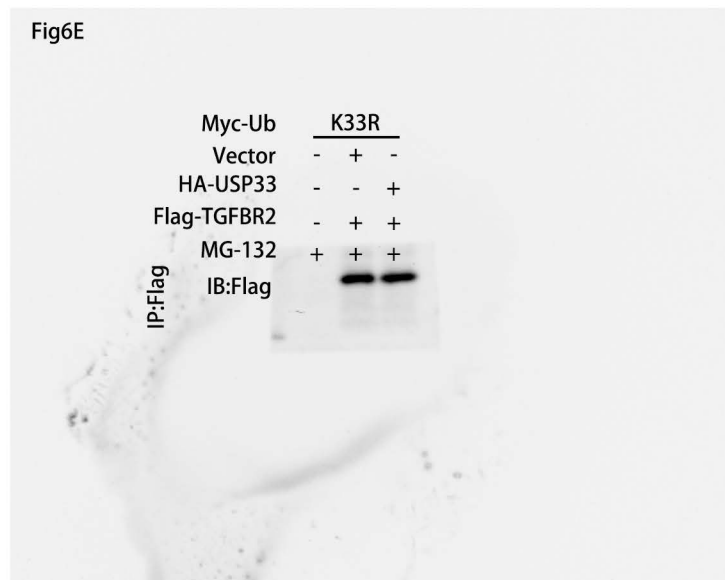

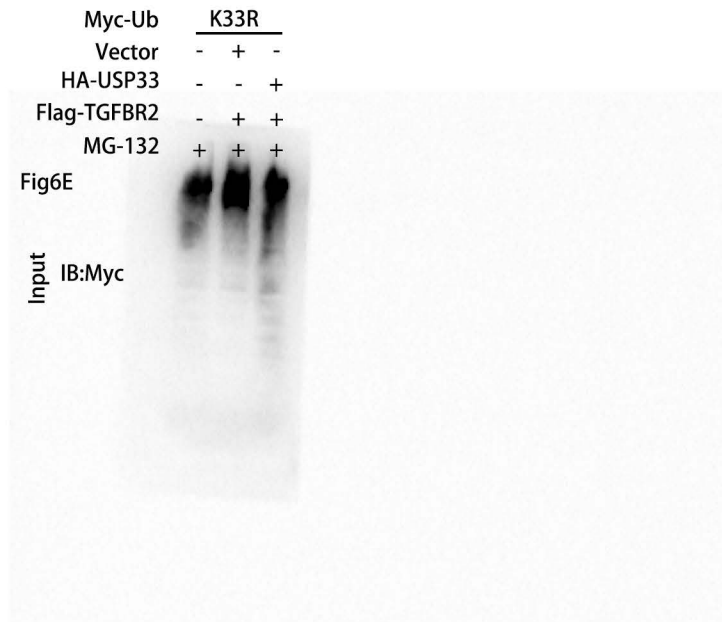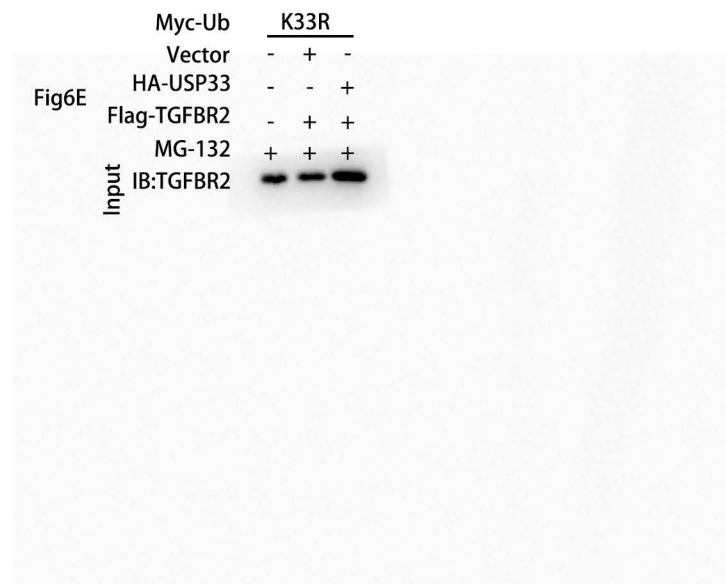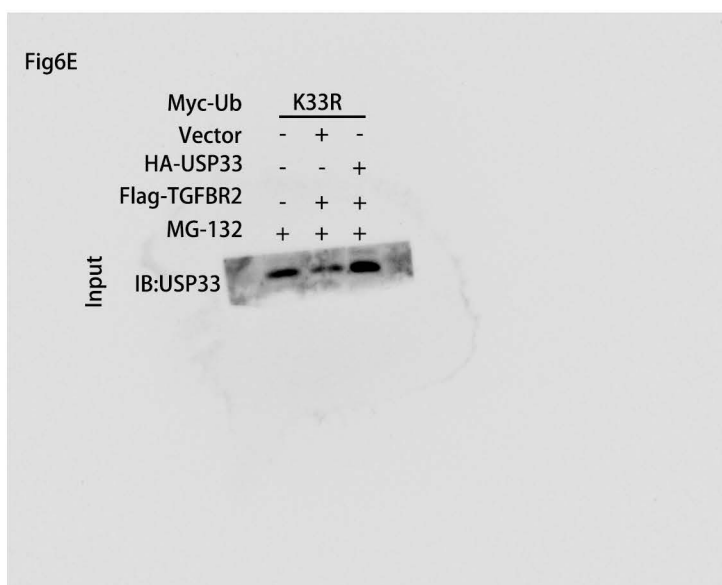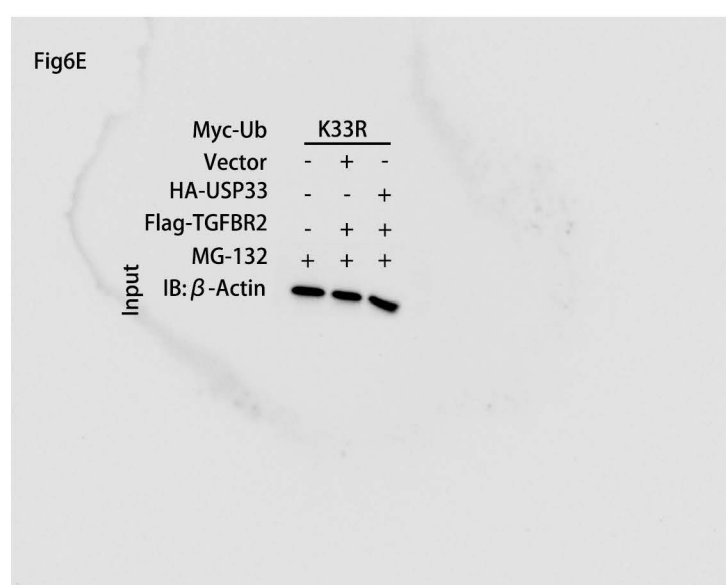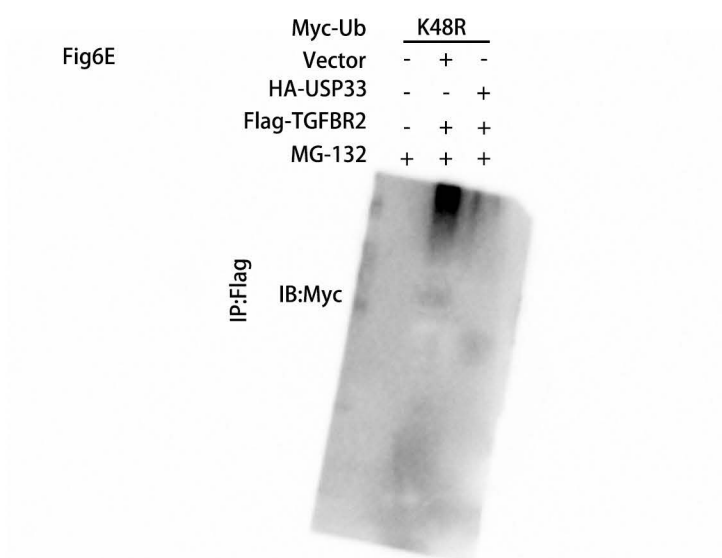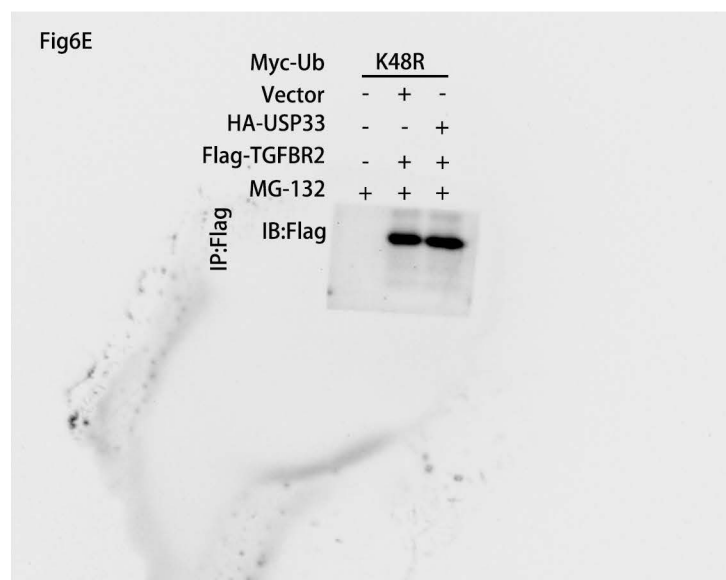



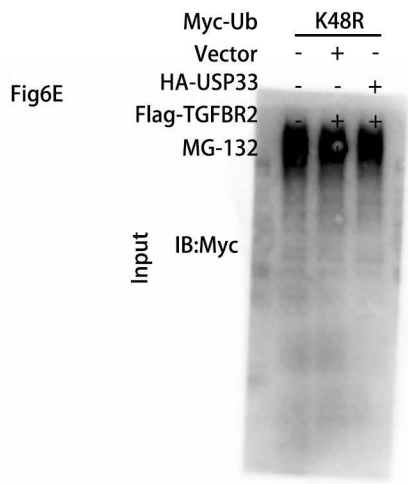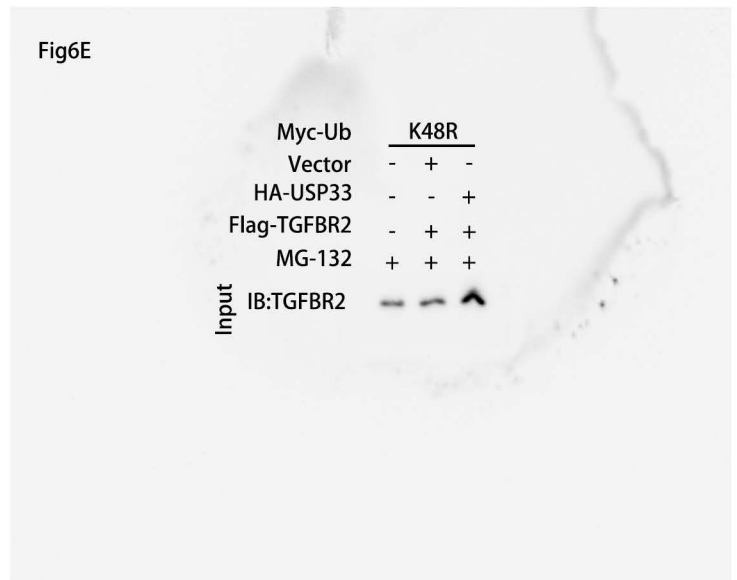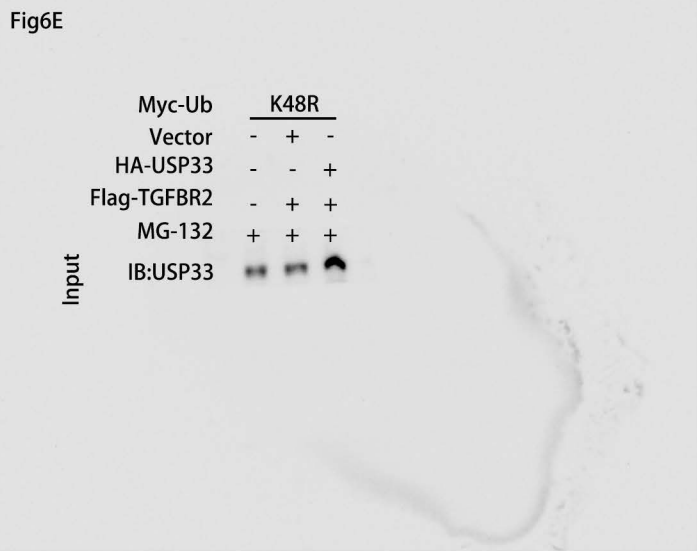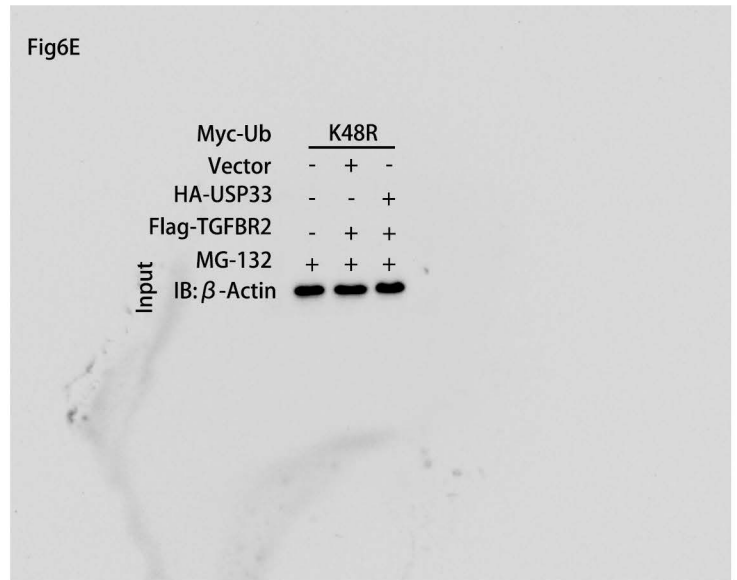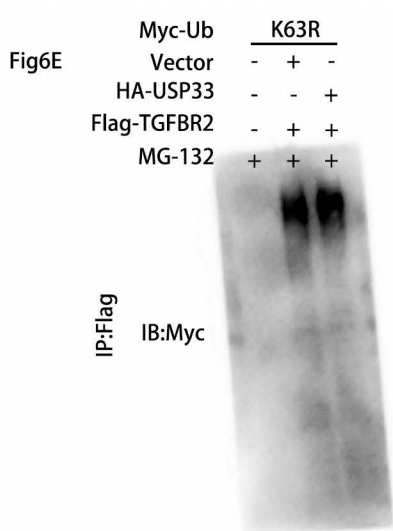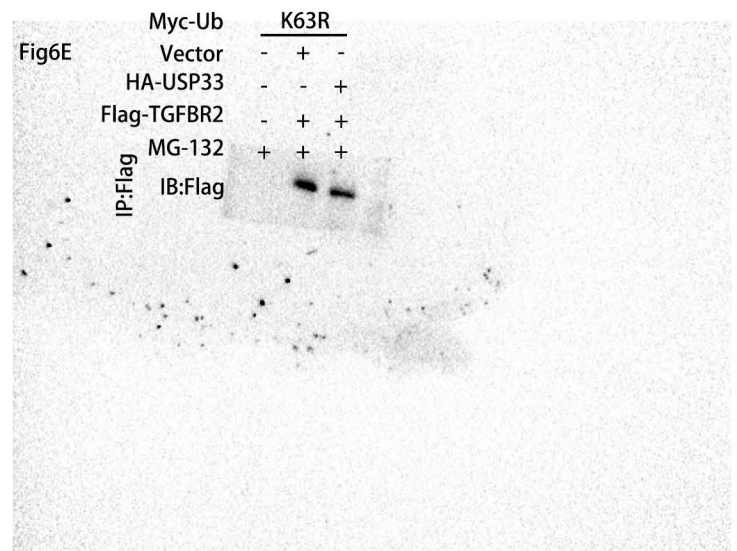

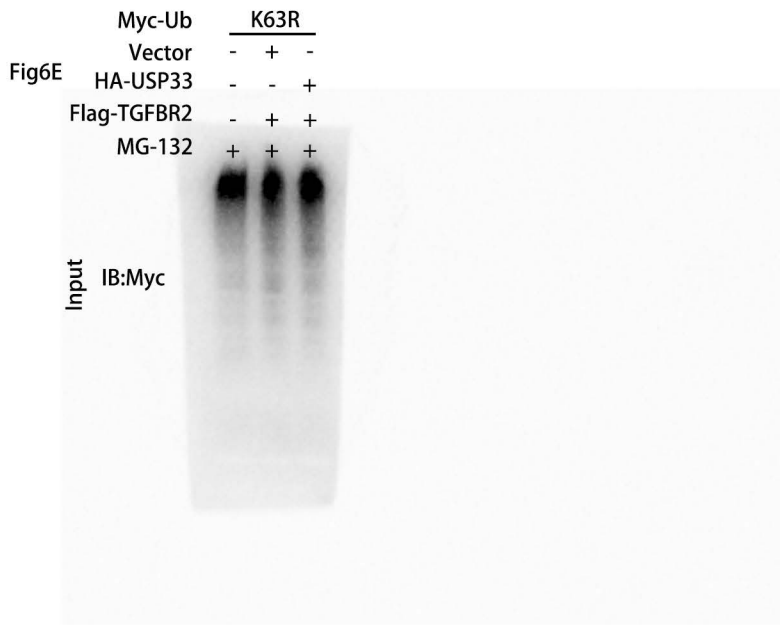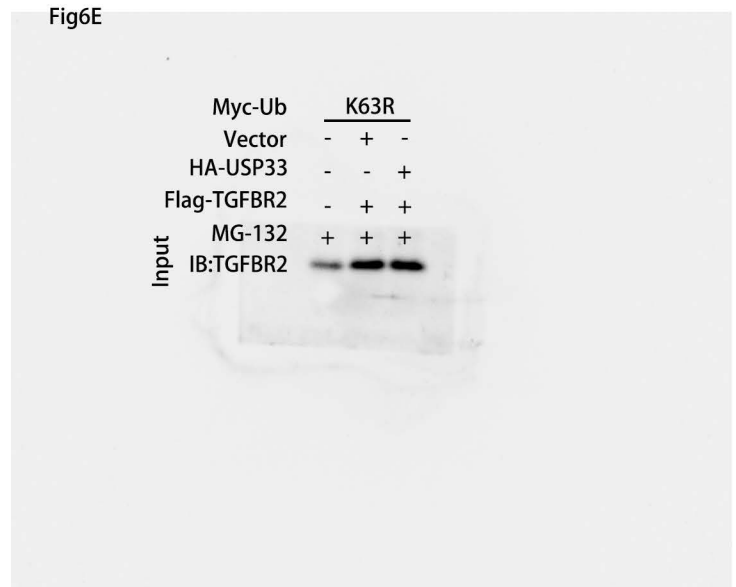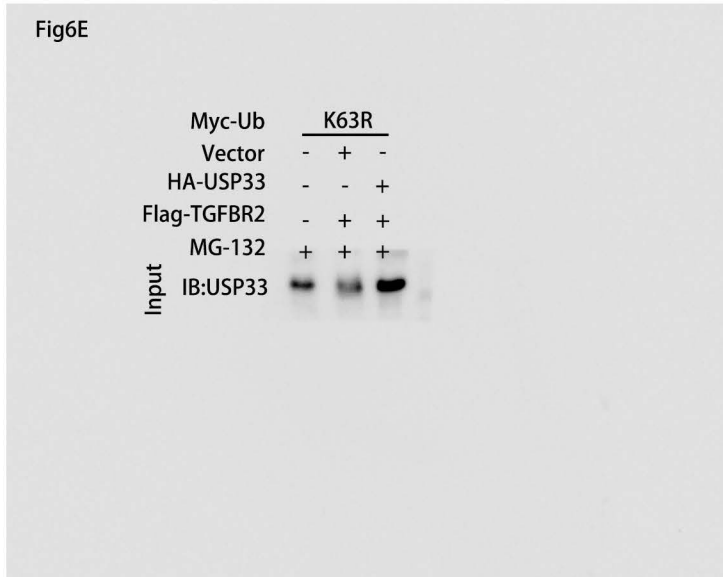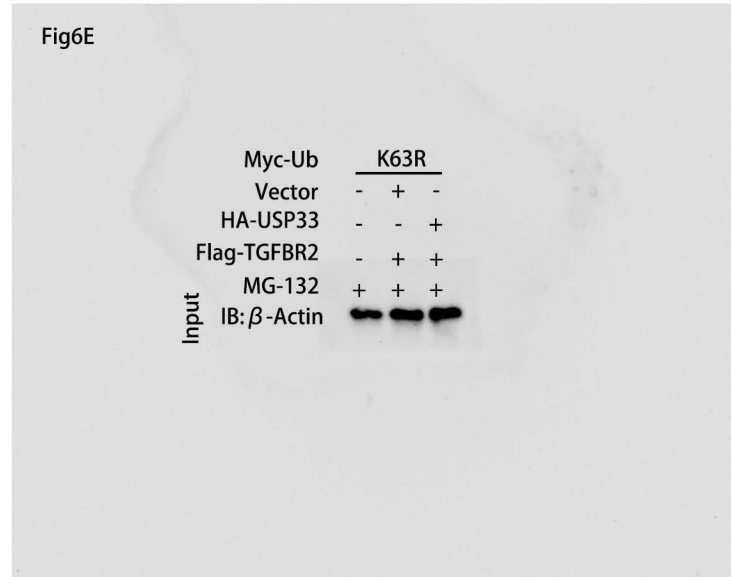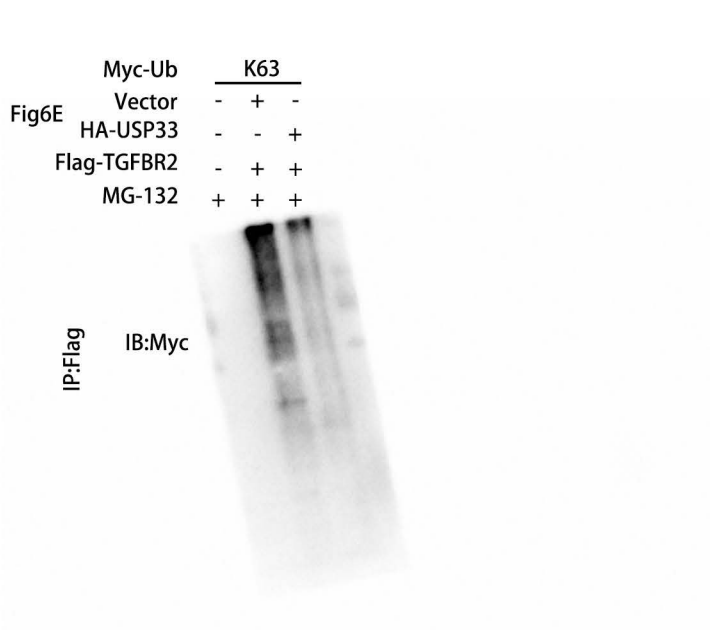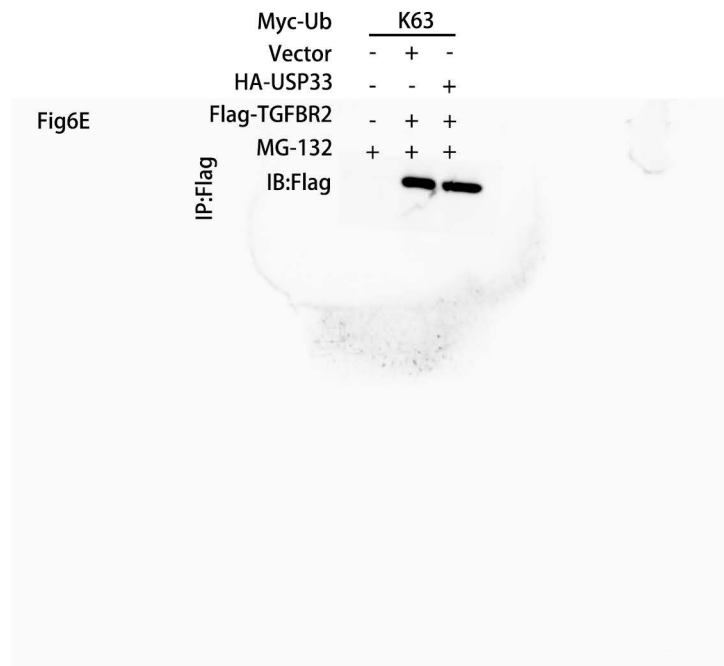

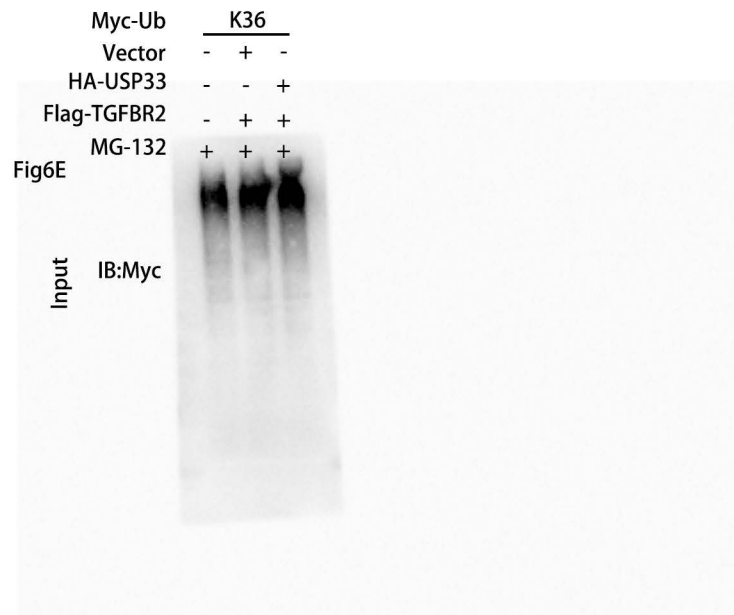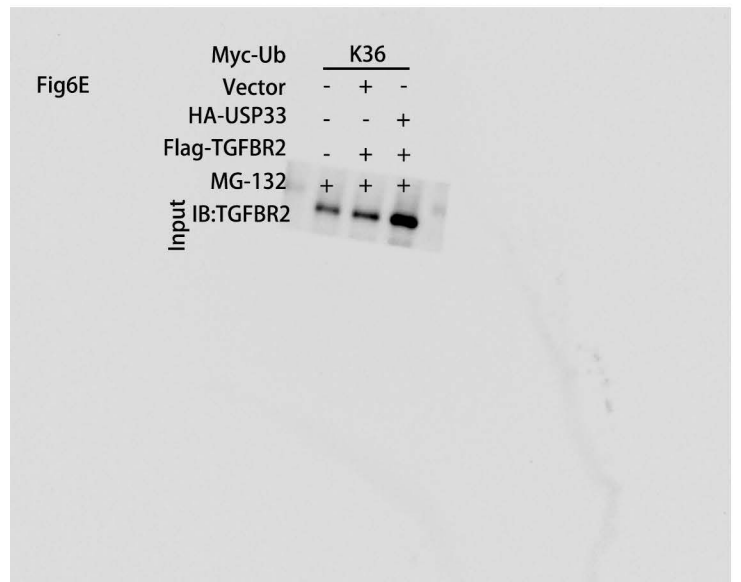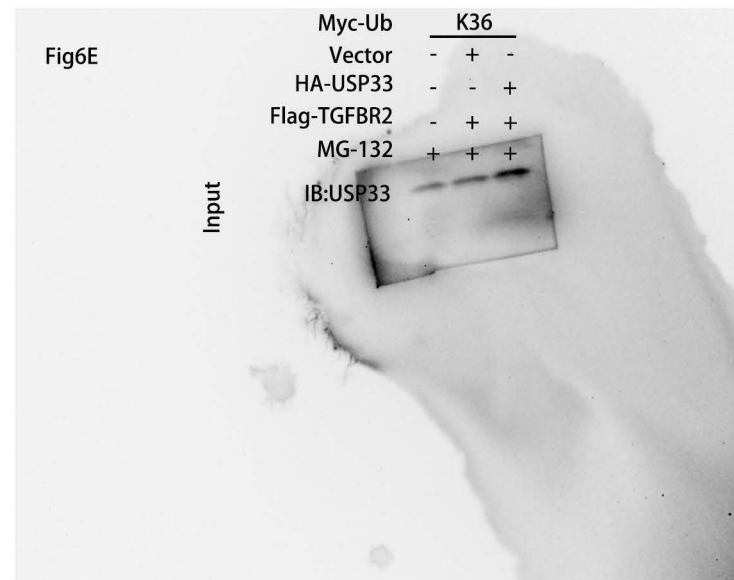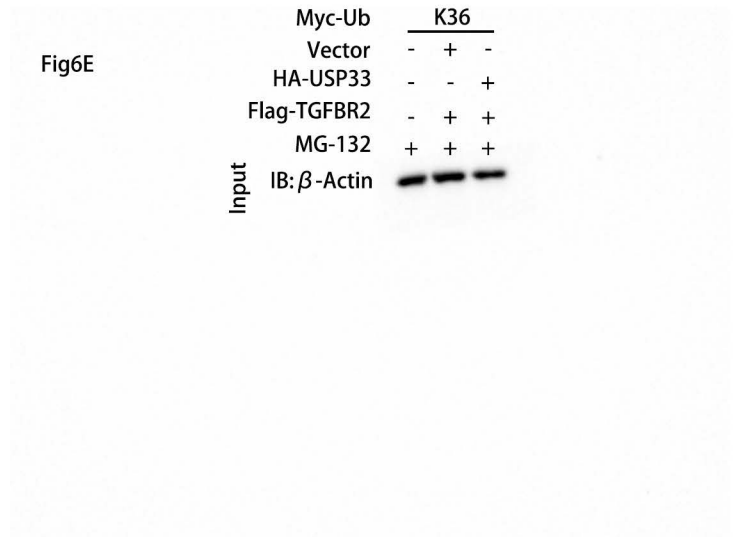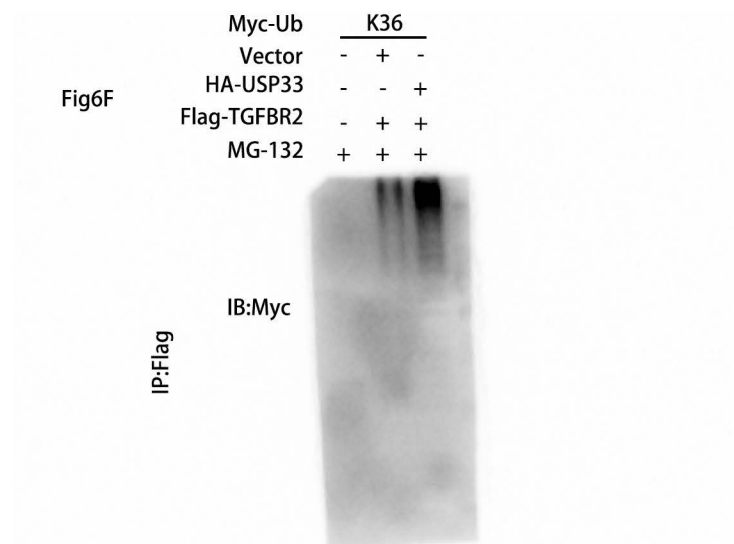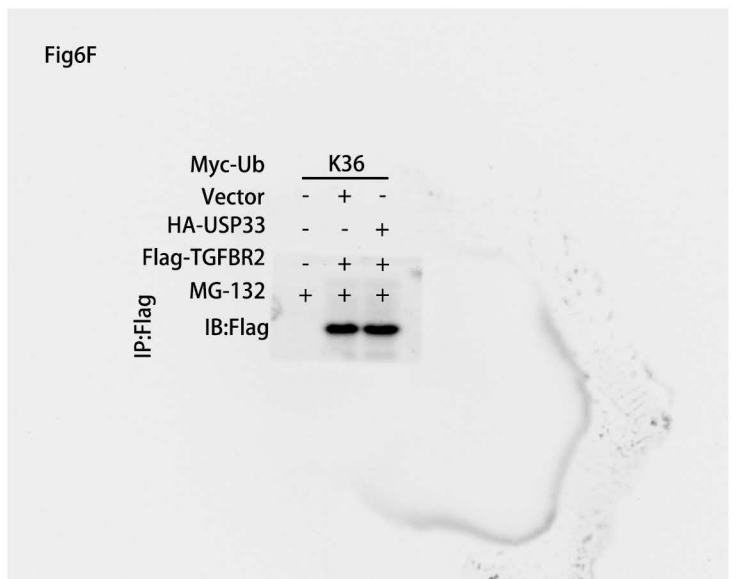

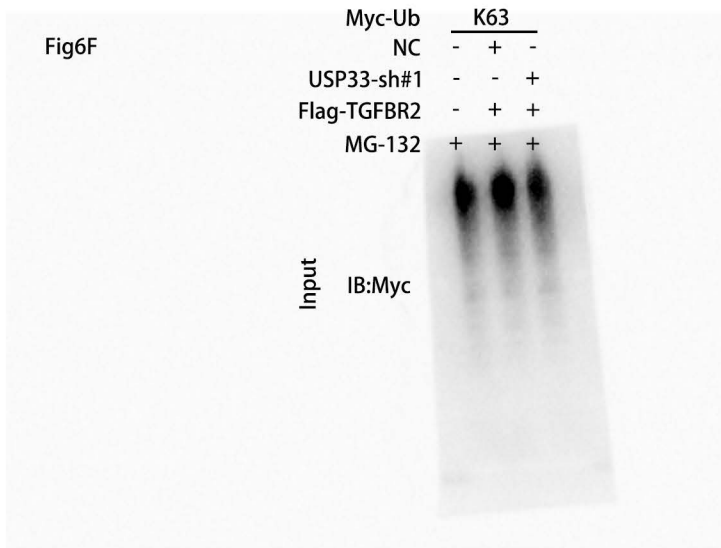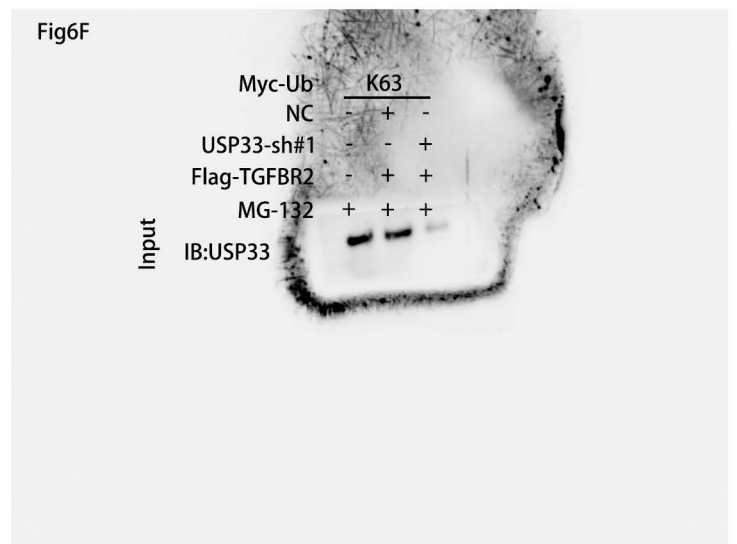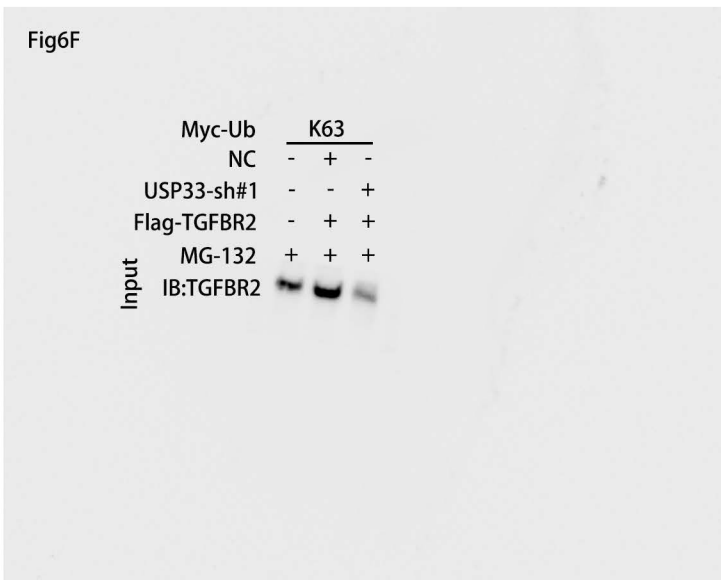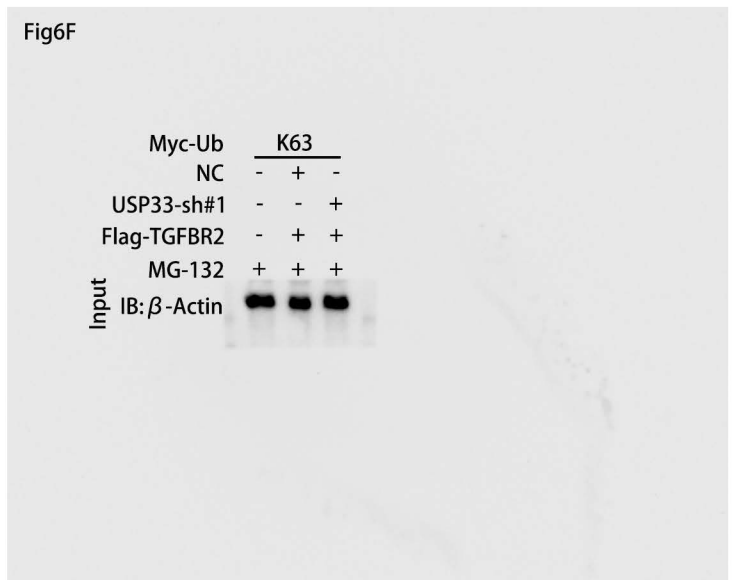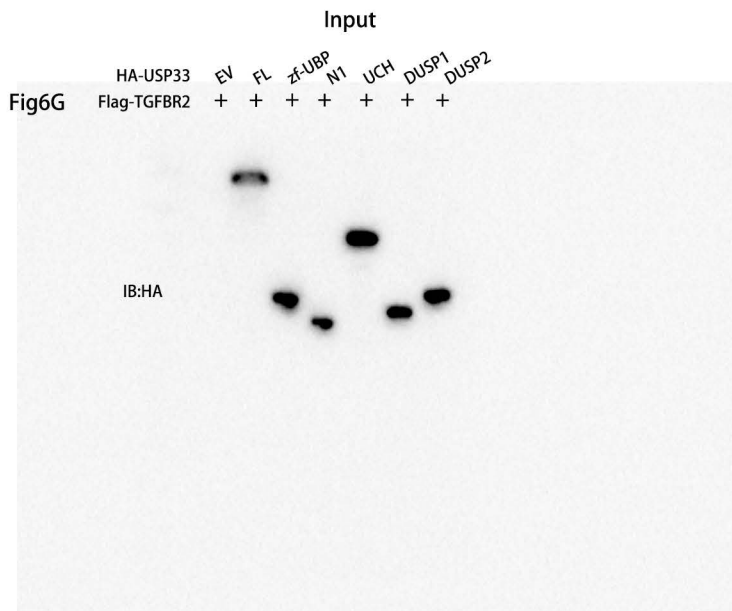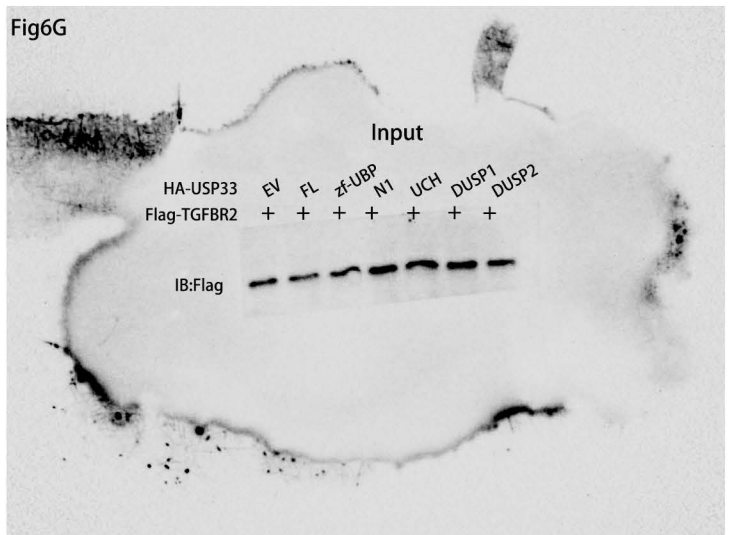

Fig6G

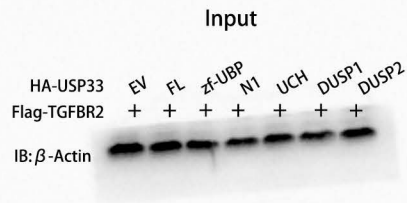

Fig6G

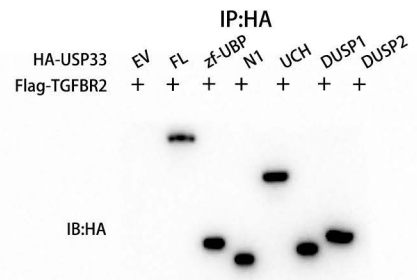

Fig6G

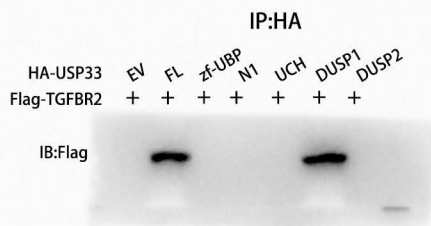

Fig6H

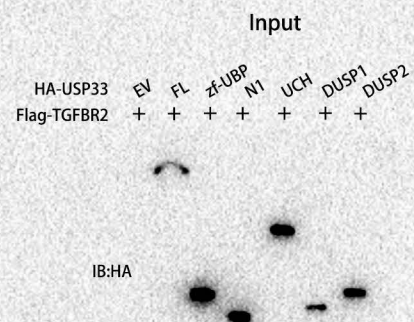

Fig6H

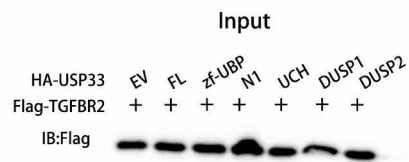

Fig6H

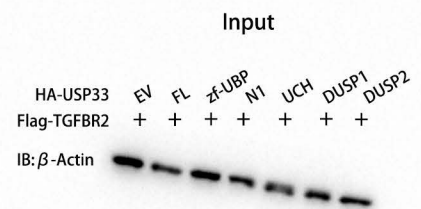

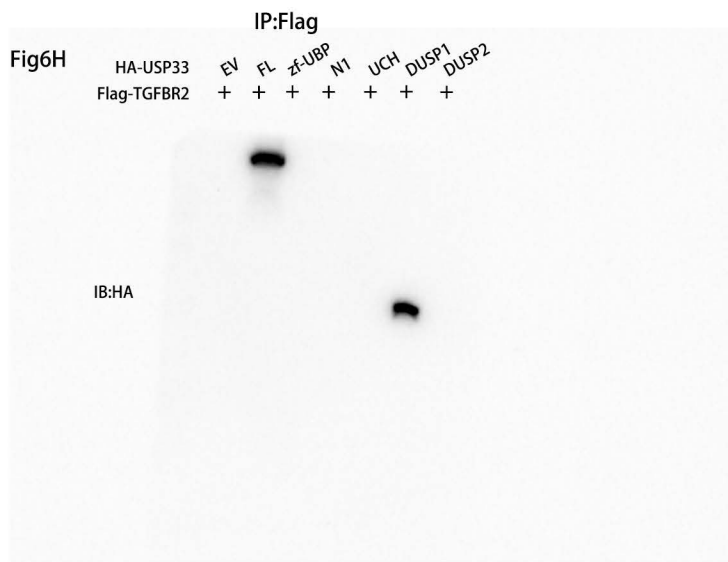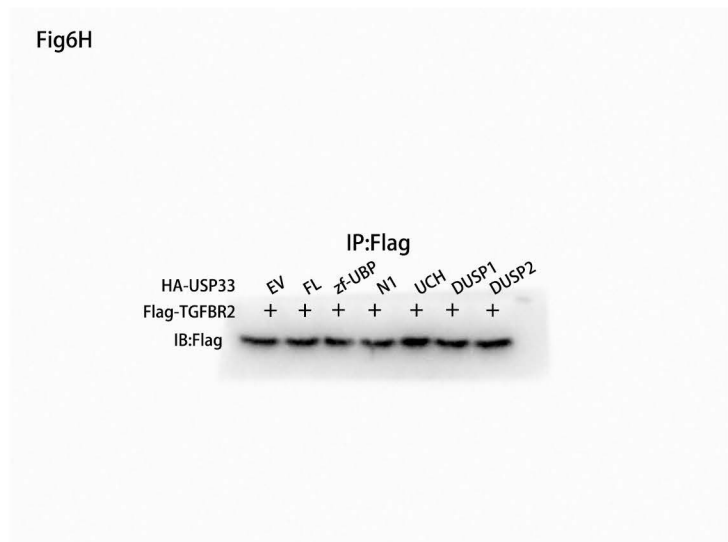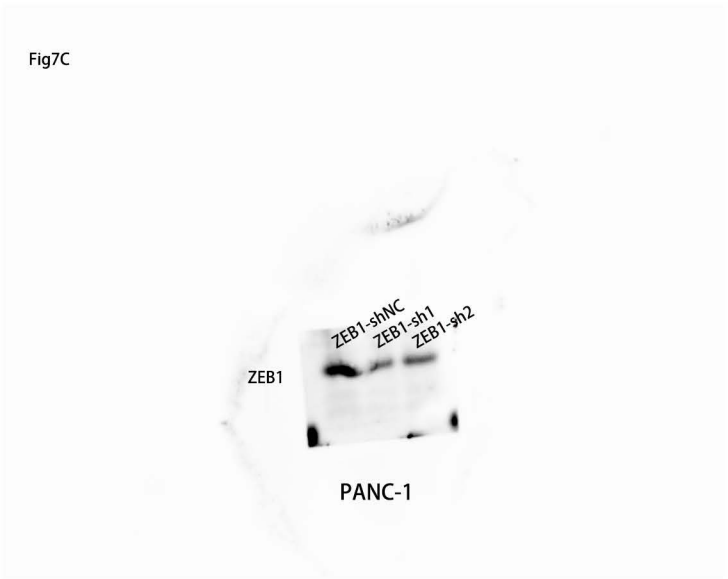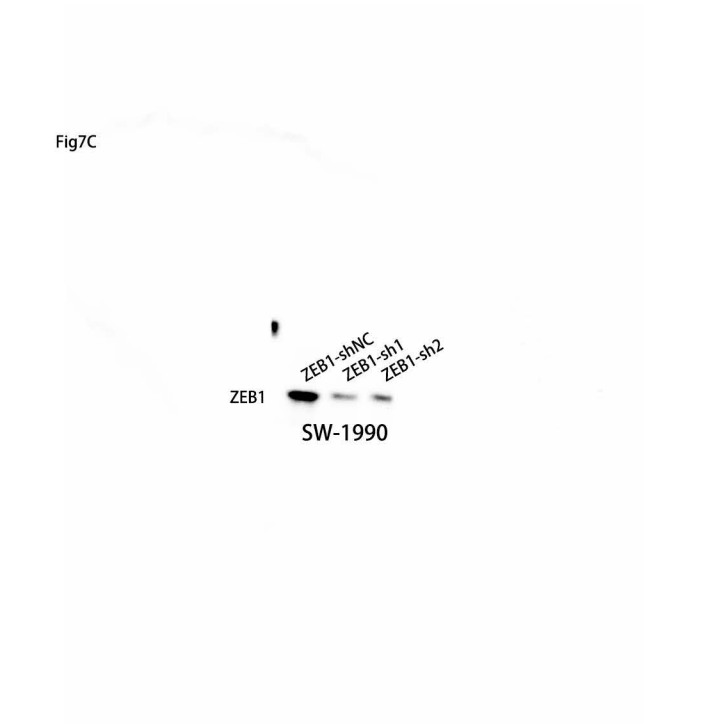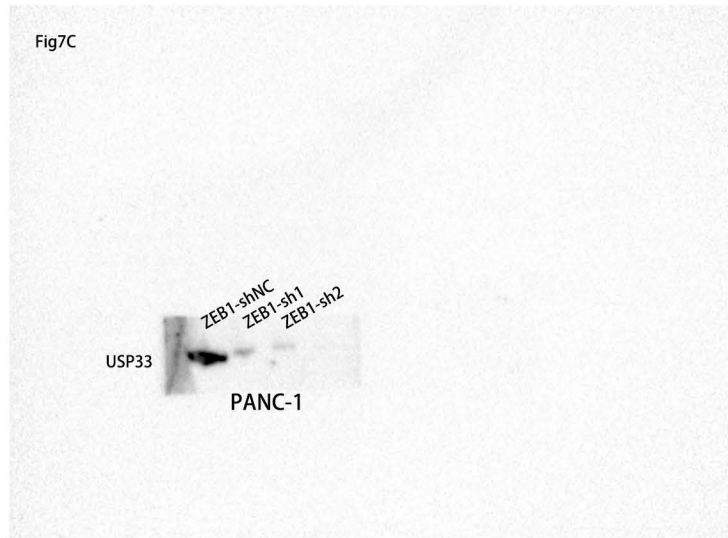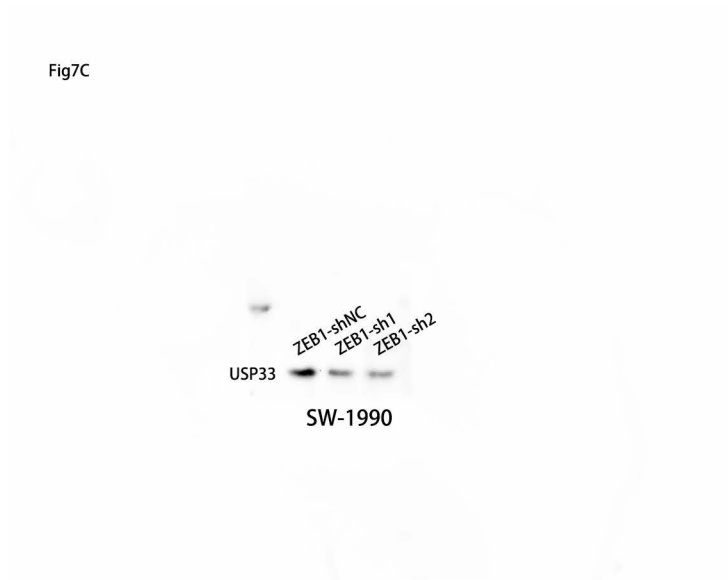

Fig7C

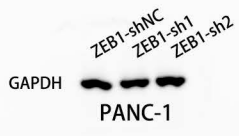

Fig7C

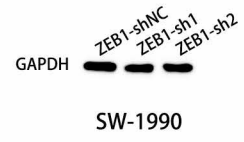

Fig7C

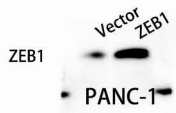

Fig7C

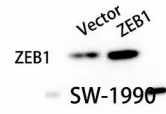

Fig7C

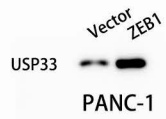

Fig7C

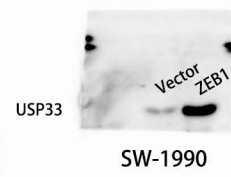

Fig7C

GAPDH  
Vector ZEB1  
PANC-1

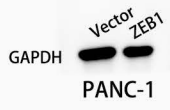

Detailed description: This Western blot image shows the protein levels of GAPDH and ZEB1 in PANC-1 cells. The GAPDH loading control shows two bands of similar intensity, indicating equal protein loading for both the Vector and ZEB1 treated groups. The ZEB1 target shows a significantly stronger band in the ZEB1 treated group compared to the Vector control, demonstrating successful overexpression of ZEB1.

Fig7C

GAPDH  
Vector ZEB1  
SW-1990

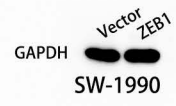

Detailed description: This Western blot image shows the protein levels of GAPDH and ZEB1 in SW-1990 cells. The GAPDH loading control shows two bands of similar intensity, indicating equal protein loading for both the Vector and ZEB1 treated groups. The ZEB1 target shows a significantly stronger band in the ZEB1 treated group compared to the Vector control, demonstrating successful overexpression of ZEB1.



FigS1A

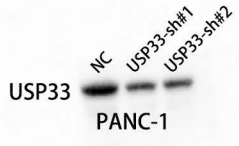

FigS1A

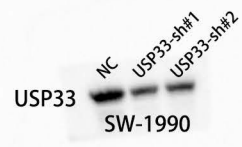

FigS1A

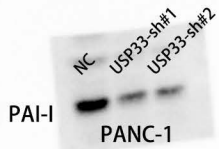

FigS1A

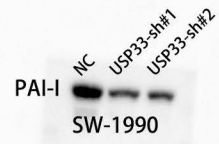

FigS1A

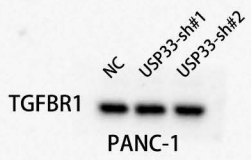

FigS1A

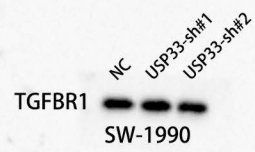

FigS1A

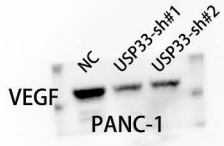

FigS1A

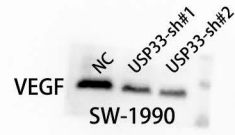

FigS1A

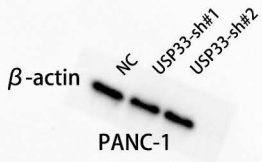

FigS1A

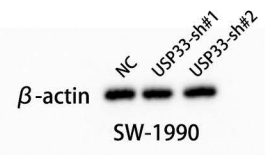

FigS1B

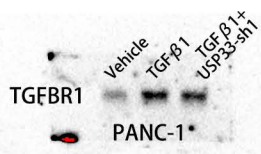

FigS1B

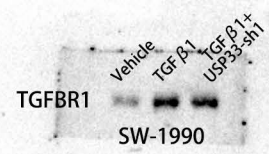

FigS1B

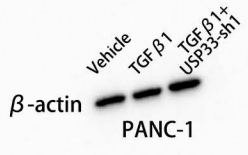

FigS1B

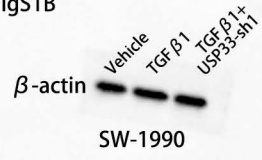

FigS3B

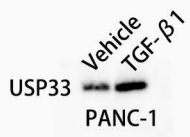

FigS3B

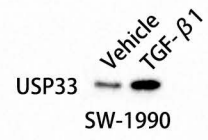

FigS3B

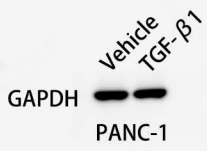

FigS3B

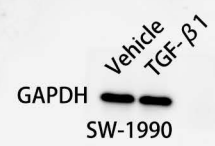

Supplement: 41419_2023_5871_MOESM10_ESM.pdf [file 41419_2023_5871_MOESM10_ESM.pdf]
